# Supplementary material for: Lipoxygenase LOX3 Is the Enigmatic Tocopherol Oxidase in Runner Bean (Phaseolus coccineus)
Source: MDPI journal article supplement (doi:10.3390/antiox13030301), 2024-02-29
Supplement: s1 [file s1]

| Accession | Description                                                                                                   | Score   | Coverage | #Peptides | MW[kDa] | calc. pI |
|-----------|---------------------------------------------------------------------------------------------------------------|---------|----------|-----------|---------|----------|
| P27481    | Linoleate 9S-lipoxygenase (Fragment) OS=Phaseolus vulgaris                                                    | 1314.45 | 44.40 %  | 26        | 84.1    | 6.58     |
| P27322    | Heat shock cognate 70 kDa protein 2 OS=Solanum lycopersicum                                                   | 1696.19 | 47.98 %  | 24        | 70.7    | 5.19     |
| P22953    | Probable mediator of RNA polymerase II transcription subunit 37e OS=Arabidopsis thaliana                      | 1613.36 | 34.41 %  | 20        | 71.3    | 5.12     |
| P29357    | Chloroplast envelope membrane 70 kDa heat shock-related protein OS=Spinacia oleracea                          | 1363.43 | 37.83 %  | 17        | 71.7    | 5.48     |
| P24629    | Heat shock cognate 70 kDa protein 1 OS=Solanum lycopersicum                                                   | 1081.55 | 35.69 %  | 16        | 71.2    | 5.26     |
| Q01390    | Sucrose synthase OS=Vigna radiata var. radiata                                                                | 499.37  | 20.37 %  | 16        | 92.0    | 6.51     |
| P13708    | Sucrose synthase OS=Glycine max                                                                               | 423.90  | 19.38 %  | 15        | 92.2    | 6.48     |
| O23755    | Elongation factor 2 OS=Beta vulgaris                                                                          | 670.75  | 19.81 %  | 14        | 93.7    | 6.30     |
| Q02028    | Stromal 70 kDa heat shock-related protein, chloroplastic OS=Pisum sativum                                     | 655.61  | 21.95 %  | 14        | 75.5    | 5.35     |
| Q9FGX1    | ATP-citrate synthase beta chain protein 2 OS=Arabidopsis thaliana                                             | 776.97  | 25.99 %  | 13        | 65.8    | 7.64     |
| P38417    | Linoleate 9S-lipoxygenase-4 OS=Glycine max                                                                    | 551.09  | 20.16 %  | 13        | 96.5    | 6.04     |
| A4GG89    | Ribulose biphosphate carboxylase large chain OS=Phaseolus vulgaris                                            | 518.25  | 26.68 %  | 12        | 52.8    | 6.39     |
| Q9LTX9    | Heat shock 70 kDa protein 7, chloroplastic OS=Arabidopsis thaliana                                            | 530.00  | 17.69 %  | 11        | 76.9    | 5.30     |
| Q93VT8    | ATP-citrate synthase beta chain protein 1 OS=Oryza sativa subsp. japonica                                     | 617.85  | 20.89 %  | 11        | 66.0    | 7.68     |
| P27480    | Linoleate 9S-lipoxygenase 1 OS=Phaseolus vulgaris                                                             | 225.20  | 10.67 %  | 9         | 97.1    | 6.96     |
| Q43155    | Ferredoxin-dependent glutamate synthase, chloroplastic OS=Spinacia oleracea                                   | 267.04  | 6.99 %   | 9         | 165.3   | 6.19     |
| Q01899    | Heat shock 70 kDa protein, mitochondrial OS=Phaseolus vulgaris                                                | 218.68  | 13.93 %  | 8         | 72.5    | 6.20     |
| Q9AWB2    | Sulfite reductase [ferredoxin], chloroplastic (Fragment) OS=Glycine max                                       | 213.93  | 15.53 %  | 8         | 63.8    | 9.06     |
| Q05045    | Chaperonin CPN60-1, mitochondrial OS=Cucurbita maxima                                                         | 270.49  | 14.26 %  | 8         | 61.0    | 5.77     |
| O49169    | Elongation factor 1-alpha OS=Manihot esculenta                                                                | 290.87  | 16.93 %  | 7         | 49.3    | 9.13     |
| P07219    | Phaseolin, alpha-type OS=Phaseolus vulgaris                                                                   | 200.89  | 19.27 %  | 7         | 49.2    | 5.38     |
| Q69RJ0    | Ferredoxin-dependent glutamate synthase, chloroplastic OS=Oryza sativa subsp. japonica                        | 201.98  | 4.77 %   | 7         | 174.9   | 6.84     |
| P35007    | Adenosylhomocysteinase OS=Catharanthus roseus                                                                 | 208.35  | 15.26 %  | 7         | 53.2    | 5.88     |
| P50249    | Adenosylhomocysteinase OS=Phalaenopsis sp.                                                                    | 191.61  | 14.64 %  | 7         | 53.1    | 6.14     |
| P32112    | Adenosylhomocysteinase OS=Triticum aestivum                                                                   | 216.26  | 14.23 %  | 7         | 53.4    | 5.92     |
| P29185    | Chaperonin CPN60-1, mitochondrial OS=Zea mays                                                                 | 228.85  | 14.04 %  | 7         | 61.2    | 5.85     |
| Q8L7B5    | Chaperonin CPN60-like 1, mitochondrial OS=Arabidopsis thaliana                                                | 222.55  | 12.48 %  | 7         | 61.9    | 6.68     |
| P25698    | Elongation factor 1-alpha OS=Glycine max                                                                      | 293.54  | 13.65 %  | 6         | 49.3    | 9.06     |
| Q9S9N1    | Heat shock 70 kDa protein 5 OS=Arabidopsis thaliana                                                           | 301.75  | 15.63 %  | 6         | 70.9    | 5.41     |
| Q40079    | V-type proton ATPase subunit B 2 OS=Hordeum vulgare                                                           | 158.21  | 12.84 %  | 6         | 53.7    | 5.24     |
| P24095    | Seed linoleate 9S-lipoxygenase OS=Glycine max                                                                 | 249.59  | 6.25 %   | 6         | 96.8    | 6.15     |
| P02853    | Phaseolin, beta-type OS=Phaseolus vulgaris                                                                    | 219.46  | 17.10 %  | 6         | 47.5    | 5.44     |
| P80607    | Alpha-1,4-glucan-protein synthase [UDP-forming] OS=Zea mays                                                   | 136.41  | 17.03 %  | 6         | 41.2    | 6.13     |
| O49485    | D-3-phosphoglycerate dehydrogenase 1, chloroplastic OS=Arabidopsis thaliana                                   | 215.56  | 10.61 %  | 6         | 63.3    | 6.58     |
| Q39857    | Xyloglucan endotransglucosylase/hydrolase 1 OS=Glycine max                                                    | 223.60  | 21.96 %  | 6         | 34.4    | 8.19     |
| Q42962    | Phosphoglycerate kinase, cytosolic OS=Nicotiana tabacum                                                       | 166.53  | 16.96 %  | 5         | 42.3    | 5.97     |
| P29409    | Phosphoglycerate kinase, chloroplastic (Fragment) OS=Spinacia oleracea                                        | 238.68  | 14.32 %  | 5         | 45.5    | 6.16     |
| Q03684    | Luminal-binding protein 4 OS=Nicotiana tabacum                                                                | 191.28  | 7.20 %   | 5         | 73.5    | 5.19     |
| P46257    | Fructose-bisphosphate aldolase, cytoplasmic isozyme 2 OS=Pisum sativum                                        | 381.72  | 17.55 %  | 5         | 38.5    | 7.25     |
| P0CG84    | Polyubiquitin (Fragment) OS=Nicotiana sylvestris                                                              | 198.63  | 62.33 %  | 5         | 42.2    | 7.58     |
| Q9FLW9    | Plastidial pyruvate kinase 2 OS=Arabidopsis thaliana                                                          | 174.31  | 8.64 %   | 5         | 63.5    | 7.03     |
| P09439    | Seed linoleate 9S-lipoxygenase-2 OS=Glycine max                                                               | 272.50  | 5.90 %   | 5         | 97.1    | 6.74     |
| P43210    | Delta-aminolevulinic acid dehydratase, chloroplastic OS=Glycine max                                           | 122.47  | 14.81 %  | 5         | 45.0    | 7.09     |
| Q9SF16    | T-complex protein 1 subunit eta OS=Arabidopsis thaliana                                                       | 145.80  | 10.59 %  | 5         | 59.7    | 6.39     |
| Q940P8    | T-complex protein 1 subunit beta OS=Arabidopsis thaliana                                                      | 133.87  | 11.95 %  | 5         | 57.2    | 5.87     |
| Q8LNZ5    | Probable xyloglucan endotransglucosylase/hydrolase protein B OS=Phaseolus angularis                           | 134.01  | 14.68 %  | 5         | 34.1    | 8.76     |
| P49034    | Sucrose synthase OS=Alnus glutinosa                                                                           | 172.19  | 5.73 %   | 5         | 91.6    | 6.81     |
| Q5QMN3    | DEAD-box ATP-dependent RNA helicase 20 OS=Oryza sativa subsp. japonica                                        | 151.31  | 11.13 %  | 5         | 54.6    | 8.27     |
| P05088    | Erythroagglutinating phytohemagglutinin OS=Phaseolus vulgaris                                                 | 159.17  | 25.45 %  | 5         | 29.7    | 5.38     |
| O80377    | 40S ribosomal protein SA OS=Daucus carota                                                                     | 190.84  | 10.44 %  | 4         | 32.4    | 5.02     |
| P54765    | GTP-binding nuclear protein Ran1A (Fragment) OS=Lotus japonicus                                               | 115.66  | 17.70 %  | 4         | 23.8    | 7.12     |
| P46523    | ATP-dependent Clp protease ATP-binding subunit clpA homolog, chloroplastic (Fragment) OS=Arabidopsis thaliana | 124.69  | 5.95 %   | 4         | 97.3    | 6.18     |
| Q9SMQ6    | Ras-related protein RABA4b OS=Arabidopsis thaliana                                                            | 126.96  | 17.86 %  | 4         | 24.4    | 6.09     |
| Q42560    | Aconitate hydratase 1 OS=Arabidopsis thaliana                                                                 | 67.14   | 4.45 %   | 4         | 98.1    | 6.40     |
| Q6Y2X6    | Putative aconitate hydratase, cytoplasmic OS=Oryza sativa subsp. japonica                                     | 86.75   | 4.34 %   | 4         | 98.0    | 6.01     |
| Q04865    | Phospholipase D alpha 1 OS=Vigna unguiculata                                                                  | 116.59  | 4.94 %   | 4         | 91.5    | 5.85     |
| Q96558    | UDP-glucose 6-dehydrogenase 1 OS=Glycine max                                                                  | 120.78  | 10.00 %  | 4         | 52.9    | 6.04     |
| Q9LF33    | UDP-glucose 6-dehydrogenase 3 OS=Arabidopsis thaliana                                                         | 130.05  | 10.63 %  | 4         | 53.1    | 6.04     |
| Q43468    | Hsp70-Hsp90 organizing protein 1 OS=Glycine max                                                               | 196.28  | 7.87 %   | 4         | 64.1    | 5.69     |
| P93254    | S-adenosylmethionine synthase OS=Mesembryanthemum crystallinum                                                | 98.36   | 15.82 %  | 4         | 42.9    | 5.71     |
| Q9SRT9    | UDP-arabinopyranose mutase 1 OS=Arabidopsis thaliana                                                          | 95.78   | 11.48 %  | 4         | 40.6    | 5.92     |
| P85413    | Alpha-1,4-glucan-protein synthase [UDP-forming] (Fragments) OS=Phoenix dactylifera                            | 102.83  | 66.67 %  | 4         | 6.8     | 8.16     |
| Q9SN95    | UDP-glucuronic acid decarboxylase 5 OS=Arabidopsis thaliana                                                   | 114.31  | 18.48 %  | 4         | 38.4    | 7.52     |
| Q84WU2    | Ubiquitin carboxyl-terminal hydrolase 13 OS=Arabidopsis thaliana                                              | 81.75   | 4.57 %   | 4         | 130.6   | 5.58     |
| P52780    | Glutamine--tRNA ligase OS=Lupinus luteus                                                                      | 146.10  | 4.66 %   | 4         | 90.4    | 6.76     |
| Q41141    | Pyrophosphate-fructose 6-phosphate 1-phosphotransferase subunit beta OS=Ricinus communis                      | 140.46  | 8.33 %   | 4         | 60.1    | 6.64     |
| P49039    | Sucrose synthase OS=Solanum tuberosum                                                                         | 142.34  | 5.09 %   | 4         | 92.5    | 6.40     |
| P24007    | Ribulose biphosphate carboxylase small chain, chloroplastic OS=Pyrus pyrifolia                                | 122.73  | 15.85 %  | 3         | 20.5    | 8.87     |
| O81221    | Actin OS=Gossypium hirsutum                                                                                   | 76.47   | 8.22 %   | 3         | 41.6    | 5.49     |
| Q9SGE0    | UDP-D-apiose/UDP-D-xylose synthase 2 OS=Arabidopsis thaliana                                                  | 90.66   | 8.23 %   | 3         | 43.8    | 5.87     |
| O82802    | Sulfite reductase 1 [ferredoxin], chloroplastic OS=Nicotiana tabacum                                          | 101.82  | 4.18 %   | 3         | 77.9    | 9.04     |
| O80988    | Glycine dehydrogenase (decarboxylating) 2, mitochondrial OS=Arabidopsis thaliana                              | 116.54  | 3.07 %   | 3         | 113.7   | 6.65     |
| O49939    | Peptidyl-prolyl cis-trans isomerase, chloroplastic OS=Spinacia oleracea                                       | 105.99  | 7.35 %   | 3         | 49.8    | 5.41     |
| P93400    | Phospholipase D alpha 1 OS=Nicotiana tabacum                                                                  | 78.15   | 3.34 %   | 3         | 91.9    | 5.63     |
| P09559    | Phosphoribulokinase, chloroplastic OS=Spinacia oleracea                                                       | 133.47  | 7.46 %   | 3         | 45.0    | 6.21     |

|        |                                                                                                                                      |        |          |   |       |      |
|--------|--------------------------------------------------------------------------------------------------------------------------------------|--------|----------|---|-------|------|
| P42896 | Enolase OS=Ricinus communis                                                                                                          | 45.54  | 10.34 %  | 3 | 47.9  | 5.78 |
| P31300 | Cysteine synthase, chloroplastic/chromoplastic OS=Capsicum annuum                                                                    | 93.43  | 12.30 %  | 3 | 40.0  | 5.27 |
| P08927 | RuBisCO large subunit-binding protein subunit beta, chloroplastic OS=Pisum sativum                                                   | 160.00 | 4.03 %   | 3 | 62.9  | 6.04 |
| O82392 | Phosphomethylpyrimidine synthase, chloroplastic OS=Arabidopsis thaliana                                                              | 56.46  | 5.75 %   | 3 | 71.9  | 6.44 |
| P27774 | Phosphoribulokinase, chloroplastic OS=Mesembryanthemum crystallinum                                                                  | 71.56  | 7.81 %   | 3 | 44.1  | 6.46 |
| Q8W250 | 1-deoxy-D-xylulose 5-phosphate reductoisomerase, chloroplastic OS=Oryza sativa subsp. japonica                                       | 120.68 | 8.03 %   | 3 | 51.4  | 6.18 |
| Q9XI91 | Eukaryotic translation initiation factor 5A-1 OS=Arabidopsis thaliana                                                                | 76.81  | 18.35 %  | 3 | 17.3  | 5.76 |
| Q84WV1 | T-complex protein 1 subunit gamma OS=Arabidopsis thaliana                                                                            | 87.99  | 5.23 %   | 3 | 60.3  | 5.77 |
| Q9AXJ4 | Eukaryotic translation initiation factor 5A OS=Manihot esculenta                                                                     | 74.49  | 18.13 %  | 3 | 17.6  | 6.20 |
| P53780 | Cystathionine beta-lyase, chloroplastic OS=Arabidopsis thaliana                                                                      | 103.47 | 6.03 %   | 3 | 50.4  | 7.36 |
| Q9XF59 | 1-deoxy-D-xylulose 5-phosphate reductoisomerase, chloroplastic OS=Arabidopsis thaliana                                               | 136.59 | 6.29 %   | 3 | 51.9  | 7.05 |
| Q9SYM5 | Trifunctional UDP-glucose 4,6-dehydratase/UDP-4-keto-6-deoxy-D-glucose 3,5-epimerase/UDP-glucose 4-epimerase OS=Arabidopsis thaliana | 86.14  | 5.38 %   | 3 | 75.3  | 7.28 |
| Q8W4M5 | Pyrophosphate-fructose 6-phosphate 1-phosphotransferase subunit beta 1 OS=Arabidopsis thaliana                                       | 127.23 | 9.19 %   | 3 | 61.4  | 6.10 |
| O23735 | Cysteine synthase OS=Brassica juncea                                                                                                 | 144.93 | 9.88 %   | 3 | 34.1  | 5.59 |
| Q42806 | Pyruvate kinase, cytosolic isozyme OS=Glycine max                                                                                    | 97.48  | 5.68 %   | 3 | 55.3  | 7.56 |
| O22718 | ATP-citrate synthase alpha chain protein 2 OS=Arabidopsis thaliana                                                                   | 136.10 | 6.38 %   | 3 | 46.7  | 5.27 |
| P51061 | Phosphoenolpyruvate carboxylase OS=Glycine max                                                                                       | 79.37  | 5.48 %   | 3 | 110.7 | 6.47 |
| O49835 | Phenylalanine ammonia-lyase 1 OS=Lithospermum erythrorhizon                                                                          | 51.43  | 5.35 %   | 3 | 77.5  | 6.00 |
| B9DGT7 | Tubulin alpha-2 chain OS=Arabidopsis thaliana                                                                                        | 88.64  | 7.33 %   | 3 | 49.5  | 5.06 |
| Q42662 | 5-methyltetrahydropteroyltryglutamate-homocysteine methyltransferase OS=Plectranthus scaber                                          | 100.35 | 2.49 %   | 2 | 84.5  | 6.51 |
| P09044 | Glyceraldehyde-3-phosphate dehydrogenase B, chloroplastic (Fragment) OS=Nicotiana tabacum                                            | 56.92  | 4.57 %   | 2 | 47.4  | 8.57 |
| Q01525 | 14-3-3-like protein GF14 omega OS=Arabidopsis thaliana                                                                               | 65.77  | 6.18 %   | 2 | 29.1  | 4.79 |
| P46266 | 14-3-3-like protein OS=Pisum sativum                                                                                                 | 71.91  | 7.31 %   | 2 | 29.3  | 4.79 |
| P00865 | Ribulose biphosphate carboxylase small chain 1, chloroplastic OS=Glycine max                                                         | 87.95  | 14.04 %  | 2 | 20.1  | 8.66 |
| A6MML4 | ATP synthase subunit beta, chloroplastic OS=Dioscorea elephantipes                                                                   | 59.23  | 4.64 %   | 2 | 53.4  | 5.39 |
| P36181 | Heat shock cognate protein 80 OS=Solanum lycopersicum                                                                                | 49.88  | 2.86 %   | 2 | 80.1  | 5.03 |
| P37829 | Fructokinase OS=Solanum tuberosum                                                                                                    | 60.25  | 7.52 %   | 2 | 33.7  | 5.71 |
| Q40466 | Eukaryotic initiation factor 4A-13 (Fragment) OS=Nicotiana tabacum                                                                   | 55.17  | 5.35 %   | 2 | 40.2  | 5.33 |
| P02873 | Alpha-amylase inhibitor 1 OS=Phaseolus vulgaris                                                                                      | 61.92  | 10.98 %  | 2 | 27.2  | 5.24 |
| Q6ESI7 | Tripeptidyl-peptidase 2 OS=Oryza sativa subsp. japonica                                                                              | 31.07  | 1.32 %   | 2 | 148.5 | 6.58 |
| P10933 | Ferredoxin--NADP reductase, leaf isozyme, chloroplastic OS=Pisum sativum                                                             | 46.50  | 6.39 %   | 2 | 40.2  | 8.40 |
| O04977 | Ferredoxin--NADP reductase, leaf-type isozyme, chloroplastic OS=Nicotiana tabacum                                                    | 42.57  | 4.70 %   | 2 | 40.4  | 8.21 |
| O04130 | D-3-phosphoglycerate dehydrogenase 2, chloroplastic OS=Arabidopsis thaliana                                                          | 97.68  | 3.21 %   | 2 | 66.4  | 6.13 |
| Q01289 | Protochlorophyllide reductase, chloroplastic OS=Pisum sativum                                                                        | 96.67  | 7.27 %   | 2 | 42.9  | 9.04 |
| Q96372 | Cell division cycle protein 48 homolog OS=Capsicum annuum                                                                            | 83.31  | 2.24 %   | 2 | 89.3  | 5.20 |
| Q94A28 | Aconitate hydratase 3, mitochondrial OS=Arabidopsis thaliana                                                                         | 48.24  | 2.41 %   | 2 | 108.4 | 7.15 |
| Q00834 | Cysteine synthase OS=Spinacia oleracea                                                                                               | 131.74 | 7.69 %   | 2 | 34.2  | 5.62 |
| Q01517 | Fructose-bisphosphate aldolase 2, chloroplastic OS=Pisum sativum                                                                     | 86.96  | 4.87 %   | 2 | 37.8  | 5.59 |
| Q40255 | Probable aldehyde dehydrogenase OS=Linum usitatissimum                                                                               | 51.29  | 3.45 %   | 2 | 61.0  | 7.28 |
| O24457 | Pyruvate dehydrogenase E1 component subunit alpha-3, chloroplastic OS=Arabidopsis thaliana                                           | 71.92  | 5.37 %   | 2 | 47.1  | 7.49 |
| O20252 | Sedoheptulose-1,7-bisphosphatase, chloroplastic OS=Spinacia oleracea                                                                 | 61.97  | 5.94 %   | 2 | 42.1  | 6.20 |
| P29356 | Fructose-bisphosphate aldolase, cytoplasmic isozyme OS=Spinacia oleracea                                                             | 75.78  | 4.20 %   | 2 | 38.4  | 6.28 |
| P46283 | Sedoheptulose-1,7-bisphosphatase, chloroplastic OS=Arabidopsis thaliana                                                              | 53.32  | 7.63 %   | 2 | 42.4  | 6.57 |
| Q42669 | Aconitate hydratase (Fragment) OS=Cucumis melo var. conomon                                                                          | 89.39  | 2.62 %   | 2 | 83.2  | 6.80 |
| Q95TH1 | Hsp70-Hsp90 organizing protein 3 OS=Arabidopsis thaliana                                                                             | 117.02 | 3.23 %   | 2 | 63.7  | 6.32 |
| P31239 | 1-aminocyclopropane-1-carboxylate oxidase OS=Pisum sativum                                                                           | 72.50  | 8.52 %   | 2 | 36.0  | 5.19 |
| Q9SIU0 | NAD-dependent malic enzyme 1, mitochondrial OS=Arabidopsis thaliana                                                                  | 32.02  | 4.65 %   | 2 | 69.6  | 5.45 |
| P56821 | Eukaryotic translation initiation factor 3 subunit B OS=Nicotiana tabacum                                                            | 64.20  | 2.36 %   | 2 | 82.5  | 5.02 |
| Q9SU63 | Aldehyde dehydrogenase family 2 member B4, mitochondrial OS=Arabidopsis thaliana                                                     | 115.49 | 3.53 %   | 2 | 58.6  | 7.46 |
| O48593 | Asparagine--tRNA ligase, chloroplastic/mitochondrial OS=Arabidopsis thaliana                                                         | 79.46  | 2.82 %   | 2 | 63.7  | 6.05 |
| P08824 | RuBisCO large subunit-binding protein subunit alpha (Fragment) OS=Ricinus communis                                                   | 73.85  | 4.24 %   | 2 | 52.3  | 4.87 |
| Q9ZPI1 | Lysine--tRNA ligase OS=Arabidopsis thaliana                                                                                          | 45.57  | 2.40 %   | 2 | 70.8  | 6.24 |
| P37221 | NAD-dependent malic enzyme 62 kDa isoform, mitochondrial OS=Solanum tuberosum                                                        | 37.53  | 4.31 %   | 2 | 69.9  | 5.94 |
| Q5Z5B2 | Protein argonaute 1D OS=Oryza sativa subsp. japonica                                                                                 | 38.85  | 1.73 %   | 2 | 115.9 | 9.03 |
| Q9LIR4 | Dihydroxy-acid dehydratase, chloroplastic OS=Arabidopsis thaliana                                                                    | 71.79  | 2.63 %   | 2 | 64.9  | 6.23 |
| F4JVN6 | Tripeptidyl-peptidase 2 OS=Arabidopsis thaliana                                                                                      | 63.70  | 2.03 %   | 2 | 152.3 | 6.07 |
| O81154 | Cysteine synthase OS=Solanum tuberosum                                                                                               | 133.99 | 7.38 %   | 2 | 34.3  | 6.62 |
| P29038 | L-lactate dehydrogenase OS=Zea mays                                                                                                  | 89.02  | 7.63 %   | 2 | 38.5  | 8.87 |
| P85984 | Profilin (Fragments) OS=Beta vulgaris                                                                                                | 71.98  | 100.00 % | 2 | 2.5   | 4.23 |
| O23627 | Glycine--tRNA ligase 1, mitochondrial OS=Arabidopsis thaliana                                                                        | 41.62  | 3.16 %   | 2 | 81.9  | 7.01 |
| Q5Z7L0 | Beta-galactosidase 9 OS=Oryza sativa subsp. japonica                                                                                 | 95.24  | 2.66 %   | 2 | 78.2  | 7.65 |
| Q957C0 | Heat shock 70 kDa protein 14 OS=Arabidopsis thaliana                                                                                 | 44.76  | 3.13 %   | 2 | 91.7  | 5.25 |
| P55964 | Pyruvate kinase isozyme G, chloroplastic (Fragment) OS=Ricinus communis                                                              | 99.93  | 4.55 %   | 2 | 46.0  | 6.58 |
| Q2QKB3 | Splicing factor U2af large subunit A OS=Triticum aestivum                                                                            | 76.20  | 2.88 %   | 2 | 67.9  | 8.29 |
| Q9FG38 | Sorting nexin 1 OS=Arabidopsis thaliana                                                                                              | 117.00 | 4.23 %   | 2 | 46.5  | 7.24 |
| Q42800 | 4-hydroxy-tetrahydrodipicolinate synthase, chloroplastic OS=Glycine max                                                              | 54.41  | 4.82 %   | 2 | 36.4  | 6.32 |
| P51074 | Annexin-like protein RJ4 OS=Fragaria ananassa                                                                                        | 191.70 | 6.37 %   | 2 | 35.6  | 7.23 |
| Q9XEA8 | Cysteine synthase OS=Oryza sativa subsp. japonica                                                                                    | 89.72  | 7.08 %   | 2 | 34.3  | 5.41 |
| Q93Z53 | Plastidial pyruvate kinase 3, chloroplastic OS=Arabidopsis thaliana                                                                  | 74.30  | 4.73 %   | 2 | 62.6  | 7.81 |
| O82013 | 17.3 kDa class II heat shock protein OS=Solanum peruvianum                                                                           | 47.57  | 16.77 %  | 2 | 17.3  | 6.80 |
| Q07176 | Mitogen-activated protein kinase homolog MMK1 OS=Medicago sativa                                                                     | 69.08  | 6.46 %   | 2 | 44.4  | 5.85 |
| Q43621 | Glutathione reductase, cytosolic OS=Pisum sativum                                                                                    | 50.22  | 5.82 %   | 2 | 53.9  | 7.01 |
| P21342 | Pyrophosphate-fructose 6-phosphate 1-phosphotransferase subunit alpha OS=Solanum tuberosum                                           | 32.57  | 5.03 %   | 2 | 67.3  | 7.43 |
| Q94K05 | T-complex protein 1 subunit theta OS=Arabidopsis thaliana                                                                            | 72.54  | 4.74 %   | 2 | 58.9  | 5.35 |
| O04905 | UMP-CMP kinase 3 OS=Arabidopsis thaliana                                                                                             | 92.95  | 8.42 %   | 2 | 22.5  | 6.01 |
| P93394 | Uracil phosphoribosyltransferase OS=Nicotiana tabacum                                                                                | 55.22  | 11.16 %  | 2 | 24.2  | 7.03 |
| O48659 | Spermidine synthase 2 OS=Hyoscyamus niger                                                                                            | 52.57  | 8.44 %   | 2 | 33.9  | 5.11 |

|        |                                                                                                 |        |         |   |      |      |
|--------|-------------------------------------------------------------------------------------------------|--------|---------|---|------|------|
| Q9LV21 | T-complex protein 1 subunit delta OS=Arabidopsis thaliana                                       | 35.63  | 4.66 %  | 2 | 57.7 | 7.68 |
| P06525 | Alcohol dehydrogenase class-P OS=Arabidopsis thaliana                                           | 32.46  | 8.71 %  | 2 | 41.2 | 6.24 |
| O04450 | T-complex protein 1 subunit epsilon OS=Arabidopsis thaliana                                     | 40.64  | 3.74 %  | 2 | 59.3 | 5.66 |
| P17817 | Pyrroline-5-carboxylate reductase OS=Glycine max                                                | 90.53  | 7.30 %  | 2 | 28.6 | 8.32 |
| Q9C9K3 | Pyrophosphate-fructose 6-phosphate 1-phosphotransferase subunit alpha 2 OS=Arabidopsis thaliana | 62.81  | 3.40 %  | 2 | 67.5 | 7.23 |
| P19588 | Lectin DB58 OS=Vigna unguiculata subsp. cylindrica                                              | 99.48  | 6.55 %  | 2 | 29.4 | 5.00 |
| Q8SKU2 | Protein TIC 62, chloroplastic OS=Pisum sativum                                                  | 55.54  | 4.12 %  | 2 | 56.9 | 8.72 |
| Q41607 | Sucrose synthase 2 OS=Tulipa gesneriana                                                         | 97.99  | 2.93 %  | 2 | 93.0 | 6.38 |
| P85952 | Unknown protein 25 (Fragments) OS=Pseudotsuga menziesii                                         | 50.44  | 59.46 % | 2 | 4.2  | 7.25 |
| P49231 | Profilin-1 OS=Phaseolus vulgaris                                                                | 95.99  | 17.56 % | 2 | 14.2 | 5.00 |
| Q03878 | Glycine-rich RNA-binding protein OS=Daucus carota                                               | 139.57 | 15.29 % | 2 | 15.7 | 5.38 |
| O80574 | 4-hydroxy-tetrahydronicotinate reductase 1, chloroplastic OS=Arabidopsis thaliana               | 138.00 | 7.20 %  | 2 | 37.5 | 6.46 |
