# Supplementary material for: Lipoxygenase LOX3 Is the Enigmatic Tocopherol Oxidase in Runner Bean (Phaseolus coccineus)
Source: MDPI journal article supplement (doi:10.3390/antiox13030301), 2024-02-29
Supplement: s1 [file s1]

[illegible]

|      |           |                                                                                 |     |
|------|-----------|---------------------------------------------------------------------------------|-----|
| LOX6 | _ABM88259 | VLDYHLLDLLPLVEEVVRKLEGGTLTYGSRALFFLTEDGTGLRLAIETLTPPYDGKPHW--NR                 | 526 |
| LOX5 | _AAG42354 | IILDHHDYLIPIYLRRINS-STTKTYATRTIFFLKDDGTLAPLAIELSKPHSQGDEHGPVSE                  | 500 |
| LOX3 | _P27481   | IILDHHDYLIPIYLRRINA-SATKTYATRTIFFLKSDGTLAPLAIELSKPHPQGDEHGPVSE                  | 373 |
| LOX4 | _AAF15296 | IILDHHDYLIPIYLRRINS-STTKTYATRTIFFLKDDGTLAPLAIELSKPHPQGDEHGPVSE                  | 482 |
| LOX1 | _P27480   | IILDHHDAFIPYLERINDLP TAKCYATRTILFLKDDNTLKPLAIELSLPNPGGKGAN--SR                  | 488 |
| LOX2 | _O24320   | IILDHHDALFPLYRINIDLPTAKSYATRTILFLKDDGTLKPLAIELSLPHRGDEF GAVSR                   | 492 |
|      |           | : **: ** : *: . : . : . : . : . : * . : . : *                                   |     |
| LOX6 | _ABM88259 | VLTP TWHATGVWLWRLLAKIHIQTHDSGYHQLVSHWLRTHCATEPYIIAANRQMSAMHP IY                 | 586 |
| LOX5 | _AAG42354 | VYVPAYEGVEAYIWLLAKAYVVVN DSCYHQIVSHWLNTHAVVEPFVIATNRQLSVVHPVY                   | 560 |
| LOX3 | _P27481   | VYVPAYEGVEAYIWLLAKAYVVVN DSCYHQIVSHWLNTHAVVEPFV LATNRQLSVVHPVY                  | 433 |
| LOX4 | _AAF15296 | VYVPAYEGVEAYIWLLAKAYVVVN DSCYHQIVSHWLNTHAVVEPFVIATNRQLSVVHPVY                   | 542 |
| LOX1 | _P27480   | VILPADGGAESTIWLLAKAYVVVN DSCYHQLMSHWLNTHAVMEPFVIATNRHL SVLHP IY                 | 548 |
| LOX2 | _O24320   | VILPAD QGAESTIWLLAKAYVVVN DSCYHQLMSHWLNTHATTEPFVIATNRHLSVLHP IY                 | 552 |
|      |           | * *: . : . : * *** : : . : ** *** : : ***** . * . : . : * : : * : : * : *       |     |
| LOX6 | _ABM88259 | RL LH P HFRYTMEINALARES LINAGGVIEDNFVPGKHSVLLSSIVYDKHWRFDHQALPKD                | 646 |
| LOX5 | _AAG42354 | KLLFPHYRDTMNINSLARKSLVNADGIEKTFLWSRYSEMSSVIYK-DWSLVDQALPND                      | 619 |
| LOX3 | _P27481   | KLLFPHYRDTMNINSLARKSLVNADGIEKTFLWG RYALELSAVIYK-DWSLHDQALPND                    | 492 |
| LOX4 | _AAF15296 | KLLFPHYRDTMNINSLARKSLVNADGIEKTFLWG RYALELSAVIYK-DWSLHDQALPND                    | 601 |
| LOX1 | _P27480   | KLLLPHYRDTMNINALARQSLINAGGVIER SFLPGEF AVE MSSAVYK-SWVF TDQALPAD                | 607 |
| LOX2 | _O24320   | KLLSPHYRDTMNINLARQSLINAGGIEQSFLPG PFSSVEMSSAVYK-SWVF TDQALPAD                   | 611 |
|      |           | : **: ** * : * : . : . : . : . : . : * : : . : * : : . : **** *                 |     |
| LOX6 | _ABM88259 | L IHRGMAVEDPTAPHGLKLTI EDPYPYANDGLVLWDALKTWFT EYVDHXXYAXSAAVQSDTE               | 706 |
| LOX5 | _AAG42354 | L IKRGVAVADPSAPHGVKLVIEDYPYASDGLEIWD AIKS WVEEY VAFYYK SDEALQKDPE               | 679 |
| LOX3 | _P27481   | L VKRGVAVKDPSAPHGVKLVIEDYPYASDGLEIWD AIKS WVV EY VAFYYK SDEV LQQDSE             | 552 |
| LOX4 | _AAF15296 | L VKRGVAVADPSAPHGVKLVIEDYPYASDGLEIWD AFKSWVVEY VAFYYK SDEV LQQDSE               | 661 |
| LOX1 | _P27480   | L IKRGMAVEDPSSPYGLRLVVEDYPYAVDGLEIWD TIQTWKDYVSLYYPTNDAVKK DTE                  | 667 |
| LOX2 | _O24320   | L IKRGMATIEDPSSPHGLRLVIDDYPYAVDGLEIWSAIQSWVKDYVSLYYATDDAIKKDTE                  | 671 |
|      |           | * : . : ** * : * : . : . : . : . : . : ***** ** * : . : . : . : * : . : . : * * |     |
| LOX6 | _ABM88259 | LQAWWEVITLGHADKKDEPWWP ELKTKEDLVEIVTTIAWTASGHHA AVNFGQFTFAGYF                   | 766 |
| LOX5 | _AAG42354 | LQAWWKELVQVGHGDLKDKPWWPKMQSRGD LVAVSTT LIWIASALHA AVNFGQYPLGGLI                 | 739 |
| LOX3 | _P27481   | LQAWWKELVQVGHGDLKDKPWWPKMQSREN LVEVSTT LIWIASALHA AVNFGQY PYGGLI                | 612 |
| LOX4 | _AAF15296 | LQAWWKELVQVGHGDLKDKPWWPKMQSREN LVEVSTT LIWIASALHA AVNFGQY PYGGLI                | 721 |
| LOX1 | _P27480   | LQAWWKEAVEKHGHD LKDKPWWPKLNPQD LIHTCSII IWIASALHA AVNFGQY PYGGFI                | 727 |
| LOX2 | _O24320   | LQAWWKEAVEKHGHD LKDKPWWPKLNT PQNLIHCISII WTASALHA AVNFGQY PYGGYI                | 731 |
|      |           | ** : ** * : : * : * ** : ***** : : : : * : * . : ***** : . * :                  |     |
| LOX6 | _ABM88259 | P NRPTIVRN NMPIEDPTDPEWELFLQKPEKTM LKSFPSIQAA TVMTVLD IL SNHSPDEE               | 826 |
| LOX5 | _AAG42354 | L NRPTISR RFMPVEGS--AEYAALAKN PEKEFL RTITG KKETLIDLTV IEILSRHASDEI              | 797 |
| LOX3 | _P27481   | L NRPTISR RFMPPEKGS--AEYAALAKN PEKEFL KTITG KKETLIDLTV IEILSRHASDEI             | 670 |
| LOX4 | _AAF15296 | L NRPTISR RFMP EKGS--AEYAALAKN PEKEFL KTITG KKETLIDLTV IEILSRHASDEI             | 779 |
| LOX1 | _P27480   | L NRPTITR RLLEP PG T--KEYGE LTSNYQKAY LR TITG KVEAIVDLSV IEILSRHASDEV           | 785 |
| LOX2 | _O24320   | L NRPTITR RLLEP PG T--KEYDEL SSNHQKAY LR TITG KYEAIVDLSV IEILSRHASDEV           | 789 |
|      |           | **** : * . : * . : * : : . : : * : : : : : : : : : : : : : : : * *              |     |
| LOX6 | _ABM88259 | YLGMSVEP-AWEEEP LVNAAFEKF KGK LIELEGLIDARNADTSKNRNGAGVVPYELLKP                  | 885 |
| LOX5 | _AAG42354 | Y LGERDGGDHWTSDAGPLEAFKRFGKK LAIEEKKLVQKNNDET LRNR TGPAKMPY TLLYP               | 857 |
| LOX3 | _P27481   | Y LGERDGGDHWTSDAGPLEAFKRFGKK LAIEEKKLVQKNNDET LRNR TGPAKMPY TLLYP               | 730 |
| LOX4 | _AAF15296 | Y LGERDGGDHWTSDAGPLEAFKRFGKK LAIEEKKLVQKNNDET LRNR TGPAKMPY TLLYP               | 839 |
| LOX1 | _P27480   | Y LGQRDNPNW TNNIKALQA FKRFGQKLKEIEEKIMGRNKDSSLRN RN GPVKMPYTVLLP                | 844 |
| LOX2 | _O24320   | Y LGQRDNPNW TDDTKALQA FQKFGNKLKEIENKILGRNNNSSLRNRV GPVKMPYTVLLP                 | 848 |
|      |           | *** : * : : * : : * : * : * : : : : : : : : : : : : : : : * *                   |     |
| LOX6 | _ABM88259 | SSD-AGVTGKGVPYSISI                                                              | 902 |
| LOX5 | _AAG42354 | SSE-EGLTFRGIPNSISI                                                              | 874 |
| LOX3 | _P27481   | SSE-EGLTFRGI-----                                                               | 741 |
| LOX4 | _AAF15296 | SSE-EGLTFRGIPNSISI                                                              | 856 |
| LOX1 | _P27480   | TCEDEGLTFRGIPNSISI                                                              | 862 |
| LOX2 | _O24320   | TSK-EGLTFRGIPNSISI                                                              | 865 |
|      |           | : . : . : * * : : * : : * : : : : : : : : : : : : : : *                         |     |
