# Supplementary material for: Lipoxygenase LOX3 Is the Enigmatic Tocopherol Oxidase in Runner Bean (Phaseolus coccineus)
Source: MDPI journal article supplement (doi:10.3390/antiox13030301), 2024-02-29
Supplement: s1 [file s1]

| sample          | Accession | Description                                                                                    | Score    | Coverage | #Peptides | MW[kDa] | calc. pI |
|-----------------|-----------|------------------------------------------------------------------------------------------------|----------|----------|-----------|---------|----------|
| 1<br>upper band | P27481    | Linoleate 9S-lipoxygenase (Fragment) OS=Phaseolus vulgaris                                     | 12277.57 | 78.95 %  | 61        | 84.1    | 6.58     |
|                 | P38417    | Linoleate 9S-lipoxygenase-4 OS=Glycine max                                                     | 5660.84  | 34.47 %  | 26        | 96.5    | 6.04     |
|                 | O23755    | Elongation factor 2 OS=Beta vulgaris                                                           | 2877.44  | 36.42 %  | 30        | 93.7    | 6.30     |
|                 | P27480    | Linoleate 9S-lipoxygenase 1 OS=Phaseolus vulgaris                                              | 2156.96  | 60.09 %  | 47        | 97.1    | 6.96     |
|                 | Q01390    | Sucrose synthase OS=Vigna radiata var. radiata                                                 | 2035.67  | 39.63 %  | 34        | 92.0    | 6.51     |
|                 | P13708    | Sucrose synthase OS=Glycine max                                                                | 1939.74  | 35.90 %  | 30        | 92.2    | 6.48     |
|                 | P27322    | Heat shock cognate 70 kDa protein 2 OS=Solanum lycopersicum                                    | 1915.88  | 52.95 %  | 26        | 70.7    | 5.19     |
|                 | A4GG89    | Ribulose biphosphate carboxylase large chain OS=Phaseolus vulgaris                             | 1899.37  | 51.26 %  | 24        | 52.8    | 6.39     |
|                 | Q02909    | Phosphoenolpyruvate carboxylase, housekeeping isozyme OS=Glycine max                           | 1778.01  | 45.50 %  | 40        | 110.6   | 5.96     |
|                 | P36479    | Ribulose biphosphate carboxylase large chain (Fragment) OS=Asarum canadense                    | 1737.93  | 39.91 %  | 19        | 51.6    | 6.29     |
|                 | P25836    | Ribulose biphosphate carboxylase large chain (Fragment) OS=Serenoa repens                      | 1676.43  | 47.97 %  | 21        | 51.8    | 6.80     |
|                 | Q32701    | Ribulose biphosphate carboxylase large chain OS=Notothixos subaureus                           | 1578.02  | 36.42 %  | 17        | 52.4    | 6.68     |
|                 | P24629    | Heat shock cognate 70 kDa protein 1 OS=Solanum lycopersicum                                    | 1511.31  | 37.85 %  | 18        | 71.2    | 5.26     |
|                 | P22953    | Probable mediator of RNA polymerase II transcription subunit 37e OS=Arabidopsis thaliana       | 1470.21  | 41.78 %  | 21        | 71.3    | 5.12     |
|                 | Q33619    | Ribulose biphosphate carboxylase large chain (Fragment) OS=Monarda didyma                      | 1433.62  | 36.58 %  | 18        | 52.4    | 6.92     |
|                 | P36484    | Ribulose biphosphate carboxylase large chain (Fragment) OS=Chiococca alba                      | 1317.59  | 40.55 %  | 17        | 52.0    | 7.02     |
|                 | Q02735    | Phosphoenolpyruvate carboxylase OS=Medicago sativa                                             | 1306.17  | 27.33 %  | 26        | 110.8   | 6.24     |
|                 | P31926    | Sucrose synthase OS=Vicia faba                                                                 | 1259.15  | 32.88 %  | 24        | 92.5    | 6.15     |
|                 | Q31750    | Ribulose biphosphate carboxylase large chain (Fragment) OS=Calycophyllum candidissimum         | 1247.87  | 26.23 %  | 15        | 51.9    | 6.23     |
|                 | Q33528    | Ribulose biphosphate carboxylase large chain (Fragment) OS=Fleroya rubrostipulata              | 1240.17  | 33.26 %  | 15        | 52.1    | 6.68     |
|                 | P28429    | Ribulose biphosphate carboxylase large chain (Fragment) OS=Lobelia sp.                         | 1237.02  | 35.19 %  | 16        | 52.0    | 6.93     |
|                 | P09918    | Seed linoleate 9S-lipoxygenase-3 OS=Pisum sativum                                              | 1226.31  | 9.06 %   | 9         | 97.6    | 6.51     |
|                 | P09439    | Seed linoleate 9S-lipoxygenase-2 OS=Glycine max                                                | 1090.49  | 17.34 %  | 14        | 97.1    | 6.74     |
|                 | P24095    | Seed linoleate 9S-lipoxygenase OS=Glycine max                                                  | 1090.46  | 19.56 %  | 18        | 96.8    | 6.15     |
|                 | P51062    | Phosphoenolpyruvate carboxylase OS=Pisum sativum                                               | 1078.55  | 27.82 %  | 26        | 110.9   | 6.38     |
|                 | P22954    | Probable mediator of RNA polymerase II transcription subunit 37c OS=Arabidopsis thaliana       | 1063.19  | 33.23 %  | 15        | 71.3    | 5.12     |
|                 | Q9MUT6    | Ribulose biphosphate carboxylase large chain OS=Mesostigma viride                              | 1042.42  | 20.84 %  | 11        | 52.5    | 6.60     |
|                 | P09186    | Seed linoleate 9S-lipoxygenase-3 OS=Glycine max                                                | 983.93   | 18.55 %  | 15        | 96.7    | 6.73     |
|                 | Q9C7X7    | Heat shock 70 kDa protein 18 OS=Arabidopsis thaliana                                           | 980.78   | 25.77 %  | 13        | 68.3    | 5.35     |
|                 | P29196    | Phosphoenolpyruvate carboxylase OS=Solanum tuberosum                                           | 979.91   | 27.67 %  | 24        | 110.2   | 5.77     |
|                 | Q69RJ0    | Ferredoxin-dependent glutamate synthase, chloroplastic OS=Oryza sativa subsp. japonica         | 883.23   | 11.76 %  | 16        | 174.9   | 6.84     |
|                 | Q9ZNZ7    | Ferredoxin-dependent glutamate synthase 1, chloroplastic/mitochondrial OS=Arabidopsis thaliana | 873.48   | 11.90 %  | 15        | 176.6   | 6.32     |
|                 | Q9FGX1    | ATP-citrate synthase beta chain protein 2 OS=Arabidopsis thaliana                              | 867.16   | 39.97 %  | 19        | 65.8    | 7.64     |
|                 | Q9MAH0    | Phosphoenolpyruvate carboxylase 1 OS=Arabidopsis thaliana                                      | 845.15   | 24.20 %  | 20        | 110.2   | 6.06     |
|                 | P51059    | Phosphoenolpyruvate carboxylase 2 OS=Zea mays                                                  | 834.42   | 24.20 %  | 21        | 109.9   | 6.04     |
|                 | P16097    | Phosphoenolpyruvate carboxylase 2 OS=Mesembryanthemum crystallinum                             | 764.02   | 21.35 %  | 20        | 109.1   | 5.86     |
|                 | P14856    | Seed linoleate 9S-lipoxygenase-2 OS=Pisum sativum                                              | 732.27   | 11.46 %  | 9         | 97.1    | 6.54     |
|                 | P0CG84    | Polyubiquitin (Fragment) OS=Nicotiana glauca                                                   | 729.58   | 70.29 %  | 6         | 42.2    | 7.58     |
|                 | Q9C522    | ATP-citrate synthase beta chain protein 1 OS=Arabidopsis thaliana                              | 728.19   | 33.88 %  | 16        | 65.8    | 7.81     |
|                 | Q93VT8    | ATP-citrate synthase beta chain protein 1 OS=Oryza sativa subsp. japonica                      | 718.92   | 29.44 %  | 15        | 66.0    | 7.68     |
|                 | P19142    | Phenylalanine ammonia-lyase class 2 OS=Phaseolus vulgaris                                      | 699.38   | 34.27 %  | 21        | 77.3    | 6.40     |
|                 | Q32223    | Ribulose biphosphate carboxylase large chain (Fragment) OS=Ephedra tweediana                   | 678.18   | 23.44 %  | 13        | 51.7    | 6.43     |
|                 | Q3ZJ74    | Ribulose biphosphate carboxylase large chain OS=Pseudoclonium akinetum                         | 540.6    | 19.79 %  | 8         | 52.4    | 6.60     |
|                 | P08170    | Seed linoleate 13S-lipoxygenase-1 OS=Glycine max                                               | 533.48   | 11.20 %  | 10        | 94.3    | 6.39     |
|                 | Q9T0P4    | Ferredoxin-dependent glutamate synthase 2, chloroplastic OS=Arabidopsis thaliana               | 523.32   | 7.37 %   | 10        | 177.6   | 7.01     |
|                 | P49034    | Sucrose synthase OS=Alnus glutinosa                                                            | 515.08   | 14.57 %  | 11        | 91.6    | 6.81     |
|                 | Q9FPT1    | Ubiquitin carboxyl-terminal hydrolase 12 OS=Arabidopsis thaliana                               | 469.47   | 9.68 %   | 13        | 130.5   | 5.77     |
|                 | Q84WU2    | Ubiquitin carboxyl-terminal hydrolase 13 OS=Arabidopsis thaliana                               | 463.94   | 10.04 %  | 13        | 130.6   | 5.58     |
|                 | P49039    | Sucrose synthase OS=Solanum tuberosum                                                          | 449.66   | 11.43 %  | 10        | 92.5    | 6.40     |
|                 | P43210    | Delta-aminolevulinic acid dehydratase, chloroplastic OS=Glycine max                            | 433.94   | 31.31 %  | 9         | 45.0    | 7.09     |
|                 | O80988    | Glycine dehydrogenase (decarboxylating) 2, mitochondrial OS=Arabidopsis thaliana               | 419.05   | 10.63 %  | 9         | 113.7   | 6.65     |
|                 | O82392    | Phosphomethylpyrimidine synthase, chloroplastic OS=Arabidopsis thaliana                        | 413.94   | 17.39 %  | 10        | 71.9    | 6.44     |
|                 | Q9SN95    | UDP-glucuronic acid decarboxylase 5 OS=Arabidopsis thaliana                                    | 392.98   | 31.67 %  | 8         | 38.4    | 7.52     |
|                 | P27991    | Phenylalanine ammonia-lyase 1 OS=Glycine max                                                   | 381.36   | 13.18 %  | 9         | 77.7    | 6.42     |
|                 | Q41140    | Pyrophosphate-fructose 6-phosphate 1-phosphotransferase subunit alpha OS=Ricinus communis      | 323.14   | 17.18 %  | 8         | 67.3    | 7.62     |
|                 | Q23255    | Adenosylhomocysteinase 1 OS=Arabidopsis thaliana                                               | 318.86   | 25.36 %  | 9         | 53.3    | 5.97     |
|                 | O04379    | Protein argonaute 1 OS=Arabidopsis thaliana                                                    | 300.65   | 8.49 %   | 7         | 116.1   | 9.29     |
|                 | P10691    | Sucrose synthase OS=Solanum tuberosum                                                          | 287.9    | 6.58 %   | 6         | 92.4    | 6.21     |
|                 | Q8H0S9    | Puromycin-sensitive aminopeptidase OS=Arabidopsis thaliana                                     | 285.45   | 10.31 %  | 11        | 99.1    | 5.67     |
|                 | Q42560    | Aconitate hydratase 1 OS=Arabidopsis thaliana                                                  | 284.42   | 15.14 %  | 8         | 98.1    | 6.40     |
|                 | Q41608    | Sucrose synthase 1 OS= Tulipa gesneriana                                                       | 246.39   | 6.71 %   | 5         | 92.2    | 6.57     |
|                 | Q7XSA2    | Protein argonaute 1B OS=Oryza sativa subsp. japonica                                           | 245.66   | 10.11 %  | 9         | 123.5   | 9.50     |
|                 | O24534    | Elongation factor 1-alpha OS=Vicia faba                                                        | 239.3    | 16.33 %  | 8         | 49.2    | 9.07     |
|                 | Q6K972    | Protein argonaute 1C OS=Oryza sativa subsp. japonica                                           | 238.7    | 8.21 %   | 7         | 113.1   | 9.50     |
|                 | P25698    | Elongation factor 1-alpha OS=Glycine max                                                       | 235.42   | 12.98 %  | 7         | 49.3    | 9.06     |
|                 | O49954    | Glycine dehydrogenase (decarboxylating), mitochondrial OS=Solanum tuberosum                    | 233.94   | 9.37 %   | 7         | 112.8   | 6.98     |
|                 | P50249    | Adenosylhomocysteinase OS=Phalaenopsis sp.                                                     | 229.64   | 14.43 %  | 7         | 53.1    | 6.14     |
|                 | P35007    | Adenosylhomocysteinase OS=Catharanthus roseus                                                  | 224.46   | 16.49 %  | 7         | 53.2    | 5.88     |
|                 | Q41141    | Pyrophosphate-fructose 6-phosphate 1-phosphotransferase subunit beta OS=Ricinus communis       | 217.61   | 14.13 %  | 7         | 60.1    | 6.64     |
|                 | Q9LF33    | UDP-glucose 6-dehydrogenase 3 OS=Arabidopsis thaliana                                          | 216.9    | 14.58 %  | 7         | 53.1    | 6.04     |
|                 | Q9STW6    | Heat shock 70 kDa protein 6, chloroplastic OS=Arabidopsis thaliana                             | 213.41   | 9.05 %   | 6         | 76.5    | 5.20     |
|                 | Q9XGW1    | Protein argonaute 10 OS=Arabidopsis thaliana                                                   | 211.18   | 4.45 %   | 5         | 110.8   | 9.23     |
|                 | Q41607    | Sucrose synthase 2 OS= Tulipa gesneriana                                                       | 211.18   | 5.61 %   | 5         | 93.0    | 6.38     |
|                 | P93736    | Valine--tRNA ligase OS=Arabidopsis thaliana                                                    | 211.01   | 7.13 %   | 8         | 125.8   | 7.11     |
|                 | Q03460    | Glutamate synthase [NADH], amyloplastic OS=Medicago sativa                                     | 202.15   | 4.38 %   | 9         | 240.2   | 6.27     |

|        |                                                                                                        |        |         |   |       |      |
|--------|--------------------------------------------------------------------------------------------------------|--------|---------|---|-------|------|
| F4JVN6 | Tripeptidyl-peptidase 2 OS=Arabidopsis thaliana                                                        | 196.05 | 2.54 %  | 3 | 152.3 | 6.07 |
| Q02028 | Stromal 70 kDa heat shock-related protein, chloroplastic OS=Pisum sativum                              | 190.44 | 10.62 % | 7 | 75.5  | 5.35 |
| Q6ESI7 | Tripeptidyl-peptidase 2 OS=Oryza sativa subsp. japonica                                                | 190.29 | 2.87 %  | 4 | 148.5 | 6.58 |
| Q9SGY2 | ATP-citrate synthase alpha chain protein 1 OS=Arabidopsis thaliana                                     | 177.26 | 5.67 %  | 3 | 46.6  | 5.50 |
| P52780 | Glutamine--tRNA ligase OS=Lupinus luteus                                                               | 175.34 | 9.57 %  | 7 | 90.4  | 6.76 |
| F4JLI5 | Xanthine dehydrogenase 2 OS=Arabidopsis thaliana                                                       | 174.28 | 3.18 %  | 4 | 148.7 | 6.73 |
| P29409 | Phosphoglycerate kinase, chloroplastic (Fragment) OS=Spinacia oleracea                                 | 172.36 | 14.55 % | 5 | 45.5  | 6.16 |
| P23686 | S-adenosylmethionine synthase 1 OS=Arabidopsis thaliana                                                | 160.61 | 17.81 % | 5 | 43.1  | 5.82 |
| Q8W3Y4 | S-adenosylmethionine synthase OS=Phaseolus lunatus                                                     | 154.95 | 12.24 % | 4 | 43.0  | 5.94 |
| Q5Z5B2 | Protein argonaute 1D OS=Oryza sativa subsp. japonica                                                   | 154.52 | 6.17 %  | 5 | 115.9 | 9.03 |
| Q8GSM2 | Lipoxygenase 2.3, chloroplastic OS=Hordeum vulgare                                                     | 150.26 | 1.90 %  | 2 | 101.2 | 6.29 |
| Q9SF16 | T-complex protein 1 subunit eta OS=Arabidopsis thaliana                                                | 146.27 | 9.87 %  | 5 | 59.7  | 6.39 |
| Q96558 | UDP-glucose 6-dehydrogenase 1 OS=Glycine max                                                           | 146.02 | 7.71 %  | 4 | 52.9  | 6.04 |
| P29185 | Chaperonin CPN60-1, mitochondrial OS=Zea mays                                                          | 141.27 | 6.07 %  | 3 | 61.2  | 5.85 |
| Q9SFH9 | Delta-aminolevulinic acid dehydratase 1, chloroplastic OS=Arabidopsis thaliana                         | 138.86 | 16.98 % | 5 | 46.7  | 7.31 |
| P15252 | Rubber elongation factor protein OS=Hevea brasiliensis                                                 | 136.48 | 46.38 % | 4 | 14.7  | 5.19 |
| B7EA73 | Puromycin-sensitive aminopeptidase OS=Oryza sativa subsp. japonica                                     | 135.46 | 5.64 %  | 5 | 99.5  | 5.59 |
| Q6YZX6 | Putative aconitate hydratase, cytoplasmic OS=Oryza sativa subsp. japonica                              | 134.72 | 5.35 %  | 4 | 98.0  | 6.01 |
| Q43191 | Probable linoleate 9S-lipoxygenase 5 OS=Solanum tuberosum                                              | 134.16 | 4.06 %  | 4 | 97.7  | 5.81 |
| P30172 | Actin-100 (Fragment) OS=Solanum tuberosum                                                              | 133.07 | 18.77 % | 4 | 39.5  | 5.83 |
| P86387 | Phospholipase D alpha 1 OS=Carica papaya                                                               | 132.39 | 6.31 %  | 5 | 92.0  | 5.80 |
| Q05045 | Chaperonin CPN60-1, mitochondrial OS=Cucurbita maxima                                                  | 131.72 | 8.70 %  | 5 | 61.0  | 5.77 |
| P29197 | Chaperonin CPN60, mitochondrial OS=Arabidopsis thaliana                                                | 127.54 | 7.80 %  | 5 | 61.2  | 5.78 |
| P53504 | Actin-1 OS=Sorghum bicolor                                                                             | 126.23 | 17.77 % | 4 | 41.8  | 5.69 |
| P15804 | Phosphoenolpyruvate carboxylase 3 OS=Sorghum bicolor                                                   | 126.09 | 5.83 %  | 6 | 108.3 | 6.27 |
| P26301 | Enolase 1 OS=Zea mays                                                                                  | 125.82 | 12.11 % | 5 | 48.0  | 5.33 |
| A9PEK8 | S-adenosylmethionine synthase 3 OS=Populus trichocarpa                                                 | 125.77 | 12.15 % | 4 | 43.1  | 5.81 |
| Q39659 | Glyoxysomal fatty acid beta-oxidation multifunctional protein MFP-a OS=Cucumis sativus                 | 120.08 | 5.52 %  | 3 | 79.1  | 9.07 |
| Q82549 | Phospholipase D alpha 1 OS=Brassica oleracea var. capitata                                             | 117.66 | 5.31 %  | 4 | 91.8  | 5.86 |
| Q9SGE0 | UDP-D-xylose/UDP-D-xylose synthase 2 OS=Arabidopsis thaliana                                           | 117.54 | 11.05 % | 3 | 43.8  | 5.87 |
| P21343 | Pyrophosphate--fructose 6-phosphate 1-phosphotransferase subunit beta OS=Solanum tuberosum             | 117.19 | 9.14 %  | 5 | 61.8  | 6.42 |
| Q9LEI9 | Enolase 2 OS=Hevea brasiliensis                                                                        | 117.09 | 13.48 % | 5 | 47.9  | 6.29 |
| Q81644 | Villin-2 OS=Arabidopsis thaliana                                                                       | 115.12 | 2.36 %  | 2 | 107.8 | 5.29 |
| Q06327 | Linoleate 9S-lipoxygenase 1 OS=Arabidopsis thaliana                                                    | 113.63 | 1.86 %  | 2 | 98.0  | 5.52 |
| Q43321 | Enolase OS=Alnus glutinosa                                                                             | 113.33 | 12.73 % | 4 | 47.6  | 5.58 |
| Q0DG35 | Glutamate synthase 2 [NADH], chloroplastic OS=Oryza sativa subsp. japonica                             | 112.75 | 2.06 %  | 4 | 239.3 | 7.01 |
| Q2QNG7 | ATP-citrate synthase alpha chain protein 3 OS=Oryza sativa subsp. japonica                             | 112.58 | 4.02 %  | 2 | 46.8  | 5.58 |
| Q9CAG3 | Lipoxygenase 6, chloroplastic OS=Arabidopsis thaliana                                                  | 111.62 | 2.84 %  | 2 | 104.4 | 7.88 |
| Q9SIK3 | Protein argonaute 5 OS=Arabidopsis thaliana                                                            | 108.9  | 3.41 %  | 3 | 111.0 | 9.47 |
| Q49485 | D-3-phosphoglycerate dehydrogenase 1, chloroplastic OS=Arabidopsis thaliana                            | 101.5  | 6.97 %  | 4 | 63.3  | 6.58 |
| P31300 | Cysteine synthase, chloroplastic/chromoplastic OS=Capsicum annuum                                      | 100.23 | 9.09 %  | 2 | 40.0  | 5.27 |
| Q8VZH2 | Aminopeptidase M1 OS=Arabidopsis thaliana                                                              | 100.01 | 2.28 %  | 2 | 98.1  | 5.50 |
| Q9M8D3 | Probable phosphoribosylformylglycinamide synthase, chloroplastic/mitochondrial OS=Arabidopsis thaliana | 96.94  | 3.34 %  | 3 | 153.9 | 5.36 |
| Q53RB0 | Probable linoleate 9S-lipoxygenase 4 OS=Oryza sativa subsp. japonica                                   | 92.23  | 3.31 %  | 3 | 98.6  | 7.31 |
| Q94A28 | Aconitate hydratase 3, mitochondrial OS=Arabidopsis thaliana                                           | 91.99  | 5.33 %  | 3 | 108.4 | 7.15 |
| P38661 | Probable protein disulfide-isomerase A6 OS=Medicago sativa                                             | 91.69  | 6.04 %  | 2 | 40.5  | 5.59 |
| Q43130 | Enolase OS=Mesembryanthemum crystallinum                                                               | 89.43  | 9.01 %  | 3 | 48.3  | 5.85 |
| P38414 | Linoleate 9S-lipoxygenase OS=Lens culinaris                                                            | 86.43  | 2.42 %  | 4 | 96.6  | 6.44 |
| Q42669 | Aconitate hydratase (Fragment) OS=Cucumis melo var. conomon                                            | 85.85  | 2.62 %  | 2 | 83.2  | 6.80 |
| Q22718 | ATP-citrate synthase alpha chain protein 2 OS=Arabidopsis thaliana                                     | 85.33  | 6.15 %  | 2 | 46.7  | 5.27 |
| P80607 | Alpha-1,4-glucan-protein synthase [UDP-forming] OS=Zea mays                                            | 84.9   | 12.91 % | 4 | 41.2  | 6.13 |
| P38418 | Lipoxygenase 2, chloroplastic OS=Arabidopsis thaliana                                                  | 84.17  | 2.34 %  | 2 | 102.0 | 5.62 |
| Q9SYP2 | Pyrophosphate--fructose 6-phosphate 1-phosphotransferase subunit alpha 1 OS=Arabidopsis thaliana       | 83.72  | 7.49 %  | 5 | 67.1  | 6.99 |
| Q9AWB2 | Sulfite reductase [ferredoxin], chloroplastic (Fragment) OS=Glycine max                                | 81.98  | 3.66 %  | 2 | 63.8  | 9.06 |
| Q43621 | Glutathione reductase, cytosolic OS=Pisum sativum                                                      | 81.59  | 5.82 %  | 2 | 53.9  | 7.01 |
| Q9SVN5 | Probable methionine--tRNA ligase OS=Arabidopsis thaliana                                               | 81.2   | 4.52 %  | 3 | 89.8  | 7.01 |
| Q53JY8 | ATP-citrate synthase subunit alpha chain protein 1 OS=Oryza sativa subsp. japonica                     | 81.07  | 8.35 %  | 2 | 45.0  | 6.07 |
| Q01289 | Protochlorophyllide reductase, chloroplastic OS=Pisum sativum                                          | 80.93  | 9.02 %  | 3 | 42.9  | 9.04 |
| Q9FLW9 | Plastidial pyruvate kinase 2 OS=Arabidopsis thaliana                                                   | 80.4   | 5.01 %  | 3 | 63.5  | 7.03 |
| Q40466 | Eukaryotic initiation factor 4A-13 (Fragment) OS=Nicotiana tabacum                                     | 79.75  | 6.48 %  | 2 | 40.2  | 5.33 |
| P21218 | Protochlorophyllide reductase B, chloroplastic OS=Arabidopsis thaliana                                 | 78.52  | 11.22 % | 4 | 43.3  | 9.16 |
| P27774 | Phosphoribulokinase, chloroplastic OS=Mesembryanthemum crystallinum                                    | 74.33  | 12.34 % | 5 | 44.1  | 6.46 |
| Q42662 | 5-methyltetrahydropteroyltriglutamate--homocysteine methyltransferase OS=Plectranthus amurensis        | 73.98  | 4.32 %  | 3 | 84.5  | 6.51 |
| Q9XES0 | 1-deoxy-D-xylulose 5-phosphate reductoisomerase, chloroplastic OS=Mentha piperita                      | 72.76  | 5.11 %  | 2 | 51.0  | 6.27 |
| Q2QTC2 | Phosphoglucan, water dikinase, chloroplastic OS=Oryza sativa subsp. japonica                           | 72.05  | 2.07 %  | 3 | 132.8 | 5.78 |
| P56821 | Eukaryotic translation initiation factor 3 subunit B OS=Nicotiana tabacum                              | 71.98  | 4.03 %  | 3 | 82.5  | 5.02 |
| P54765 | GTP-binding nuclear protein Ran1A (Fragment) OS=Lotus japonicus                                        | 69.18  | 9.09 %  | 2 | 23.8  | 7.12 |
| Q9ZPS3 | Glutamate decarboxylase 4 OS=Arabidopsis thaliana                                                      | 68.4   | 6.29 %  | 2 | 56.0  | 6.34 |
| Q81154 | Cysteine synthase OS=Solanum tuberosum                                                                 | 67.07  | 7.38 %  | 2 | 34.3  | 6.62 |
| Q22518 | 40S ribosomal protein SA OS=Glycine max                                                                | 65.01  | 10.32 % | 3 | 33.9  | 5.26 |
| Q9LSH2 | Glutamate decarboxylase 5 OS=Arabidopsis thaliana                                                      | 64.78  | 5.87 %  | 2 | 55.7  | 5.66 |
| Q07176 | Mitogen-activated protein kinase homolog MMK1 OS=Medicago sativa                                       | 64.59  | 6.72 %  | 2 | 44.4  | 5.85 |
| Q9M401 | Branched-chain-amino-acid aminotransferase 3, chloroplastic OS=Arabidopsis thaliana                    | 62.89  | 4.60 %  | 2 | 44.9  | 8.10 |
| Q42601 | Carbamoyl-phosphate synthase large chain, chloroplastic OS=Arabidopsis thaliana                        | 61.44  | 2.27 %  | 3 | 129.9 | 5.73 |
| Q6ZY51 | Phosphoglucan, water dikinase, chloroplastic OS=Arabidopsis thaliana                                   | 61.37  | 1.25 %  | 2 | 131.2 | 6.24 |
| Q38931 | Peptidyl-prolyl cis-trans isomerase FKBP62 OS=Arabidopsis thaliana                                     | 51.27  | 4.36 %  | 2 | 61.4  | 5.31 |

|                 |        |                                                                                          |          |         |    |       |      |
|-----------------|--------|------------------------------------------------------------------------------------------|----------|---------|----|-------|------|
| 2<br>lower band | P27481 | Linoleate 9S-lipoxygenase (Fragment) OS=Phaseolus vulgaris                               | 11605.42 | 79.89 % | 52 | 84.1  | 6.58 |
|                 | P38417 | Linoleate 9S-lipoxygenase-4 OS=Glycine max                                               | 5724.9   | 24.85 % | 20 | 96.5  | 6.04 |
|                 | P27322 | Heat shock cognate 70 kDa protein 2 OS=Solanum lycopersicum                              | 4265.64  | 57.61 % | 31 | 70.7  | 5.19 |
|                 | Q01390 | Sucrose synthase OS=Vigna radiata var. radiata                                           | 3589.49  | 57.64 % | 41 | 92.0  | 6.51 |
|                 | P13708 | Sucrose synthase OS=Glycine max                                                          | 3477.56  | 51.93 % | 38 | 92.2  | 6.48 |
|                 | Q23755 | Elongation factor 2 OS=Beta vulgaris                                                     | 3455.85  | 35.23 % | 28 | 93.7  | 6.30 |
|                 | P24629 | Heat shock cognate 70 kDa protein 1 OS=Solanum lycopersicum                              | 3161.4   | 42.31 % | 22 | 71.2  | 5.26 |
|                 | P48715 | Ribulose biphosphate carboxylase large chain (Fragment) OS=Sinapis alba                  | 3058.16  | 54.12 % | 25 | 52.4  | 6.68 |
|                 | P29357 | Chloroplast envelope membrane 70 kDa heat shock-related protein OS=Spinacia oleracea     | 2909.07  | 42.57 % | 21 | 71.7  | 5.48 |
|                 | P28442 | Ribulose biphosphate carboxylase large chain (Fragment) OS=Platytheca verticillata       | 2889.42  | 50.97 % | 22 | 51.6  | 6.48 |
|                 | P22953 | Probable mediator of RNA polymerase II transcription subunit 37e OS=Arabidopsis thaliana | 2867.85  | 51.31 % | 27 | 71.3  | 5.12 |
|                 | Q32040 | Ribulose biphosphate carboxylase large chain (Fragment) OS=Cornus obliqua                | 2811.8   | 49.25 % | 22 | 51.5  | 6.44 |
|                 | P69572 | Ribulose biphosphate carboxylase large chain (Fragment) OS=Lupinus atlanticus            | 2792.16  | 48.79 % | 21 | 50.3  | 6.68 |
|                 | Q9FGX1 | ATP-citrate synthase beta chain protein 2 OS=Arabidopsis thaliana                        | 2695.83  | 45.72 % | 24 | 65.8  | 7.64 |
|                 | Q32041 | Ribulose biphosphate carboxylase large chain (Fragment) OS=Cornus oblonga                | 2667.01  | 48.39 % | 20 | 51.6  | 6.58 |
|                 | P28436 | Ribulose biphosphate carboxylase large chain (Fragment) OS=Oxalis dillenii               | 2640.81  | 48.07 % | 19 | 51.7  | 6.33 |
|                 | Q31672 | Ribulose biphosphate carboxylase large chain (Fragment) OS=Antirhea lucida               | 2538.11  | 40.72 % | 19 | 52.1  | 6.92 |
|                 | P28419 | Ribulose biphosphate carboxylase large chain (Fragment) OS=Hamamelis mollis              | 2397.07  | 49.25 % | 22 | 51.5  | 6.48 |
|                 | Q33528 | Ribulose biphosphate carboxylase large chain (Fragment) OS=Fleroya rubrostipulata        | 2328.82  | 46.27 % | 17 | 52.1  | 6.68 |
|                 | P27480 | Linoleate 9S-lipoxygenase 1 OS=Phaseolus vulgaris                                        | 2322.8   | 53.13 % | 36 | 97.1  | 6.96 |
|                 | Q93VT8 | ATP-citrate synthase beta chain protein 1 OS=Oryza sativa subsp. japonica                | 2309.83  | 37.34 % | 19 | 66.0  | 7.68 |
|                 | P36484 | Ribulose biphosphate carboxylase large chain (Fragment) OS=Chiococca alba                | 2295.29  | 42.68 % | 19 | 52.0  | 7.02 |
|                 | Q9C522 | ATP-citrate synthase beta chain protein 1 OS=Arabidopsis thaliana                        | 2244.49  | 43.09 % | 22 | 65.8  | 7.81 |
|                 | Q31750 | Ribulose biphosphate carboxylase large chain (Fragment) OS=Calyophyllum candidissim      | 2179.31  | 33.69 % | 17 | 51.9  | 6.23 |
|                 | Q8W4M5 | Pyrophosphate--fructose 6-phosphate 1-phosphotransferase subunit beta 1 OS=Arabidop      | 2159.12  | 24.20 % | 15 | 61.4  | 6.10 |
|                 | Q33619 | Ribulose biphosphate carboxylase large chain (Fragment) OS=Monarda didyma                | 2063.08  | 40.38 % | 19 | 52.4  | 6.92 |
|                 | P34767 | Ribulose biphosphate carboxylase large chain (Fragment) OS=Alisma plantago-aquatica      | 1933.73  | 47.21 % | 18 | 43.9  | 7.15 |
|                 | Q41141 | Pyrophosphate--fructose 6-phosphate 1-phosphotransferase subunit beta OS=Ricinus cor     | 1883.44  | 23.91 % | 17 | 60.1  | 6.64 |
|                 | P19142 | Phenylalanine ammonia-lyase class 2 OS=Phaseolus vulgaris                                | 1719.73  | 60.39 % | 30 | 77.3  | 6.40 |
|                 | Q9C7X7 | Heat shock 70 kDa protein 18 OS=Arabidopsis thaliana                                     | 1656.45  | 31.60 % | 16 | 68.3  | 5.35 |
|                 | P26413 | Heat shock 70 kDa protein OS=Glycine max                                                 | 1580.86  | 19.69 % | 9  | 70.8  | 5.49 |
|                 | Q05046 | Chaperonin CPN60-2, mitochondrial OS=Cucurbita maxima                                    | 1538.53  | 33.04 % | 19 | 61.1  | 6.64 |
|                 | Q9MUT6 | Ribulose biphosphate carboxylase large chain OS=Mesostigma viride                        | 1514.11  | 25.05 % | 13 | 52.5  | 6.60 |
|                 | Q02909 | Phosphoenolpyruvate carboxylase, housekeeping isozyme OS=Glycine max                     | 1423.67  | 40.54 % | 31 | 110.6 | 5.96 |
|                 | Q01899 | Heat shock 70 kDa protein, mitochondrial OS=Phaseolus vulgaris                           | 1414.6   | 45.33 % | 23 | 72.5  | 6.20 |
|                 | Q41140 | Pyrophosphate--fructose 6-phosphate 1-phosphotransferase subunit alpha OS=Ricinus co     | 1412.77  | 26.74 % | 13 | 67.3  | 7.62 |
|                 | Q9AWB2 | Sulfite reductase [ferredoxin], chloroplastic (Fragment) OS=Glycine max                  | 1339.52  | 40.49 % | 20 | 63.8  | 9.06 |
|                 | P51061 | Phosphoenolpyruvate carboxylase OS=Glycine max                                           | 1281.18  | 28.23 % | 23 | 110.7 | 6.47 |
|                 | Q05045 | Chaperonin CPN60-1, mitochondrial OS=Cucurbita maxima                                    | 1249.43  | 30.09 % | 19 | 61.0  | 5.77 |
|                 | Q8L7B5 | Chaperonin CPN60-like 1, mitochondrial OS=Arabidopsis thaliana                           | 1217.22  | 24.27 % | 12 | 61.9  | 6.68 |
|                 | P21343 | Pyrophosphate--fructose 6-phosphate 1-phosphotransferase subunit beta OS=Solanum tu      | 1216.15  | 20.39 % | 14 | 61.8  | 6.42 |
|                 | P12466 | Ribulose biphosphate carboxylase large chain OS=Chlorella vulgaris                       | 1208.59  | 21.68 % | 11 | 52.5  | 6.48 |
|                 | P29185 | Chaperonin CPN60-1, mitochondrial OS=Zea mays                                            | 1193.69  | 31.54 % | 18 | 61.2  | 5.85 |
|                 | Q02028 | Stromal 70 kDa heat shock-related protein, chloroplastic OS=Pisum sativum                | 1192.99  | 28.33 % | 17 | 75.5  | 5.35 |
|                 | Q82392 | Phosphomethylpyrimidine synthase, chloroplastic OS=Arabidopsis thaliana                  | 1151.11  | 24.38 % | 15 | 71.9  | 6.44 |
|                 | Q9STW6 | Heat shock 70 kDa protein 6, chloroplastic OS=Arabidopsis thaliana                       | 1151.09  | 22.70 % | 15 | 76.5  | 5.20 |
|                 | Q96558 | UDP-glucose 6-dehydrogenase 1 OS=Glycine max                                             | 1144.51  | 61.46 % | 22 | 52.9  | 6.04 |
|                 | Q02735 | Phosphoenolpyruvate carboxylase OS=Medicago sativa                                       | 1105.38  | 23.40 % | 21 | 110.8 | 6.24 |
|                 | Q42806 | Pyruvate kinase, cytosolic isozyme OS=Glycine max                                        | 1053.33  | 47.95 % | 20 | 55.3  | 7.56 |
|                 | Q9SIU0 | NAD-dependent malic enzyme 1, mitochondrial OS=Arabidopsis thaliana                      | 1052.01  | 24.40 % | 11 | 69.6  | 5.45 |
|                 | P49034 | Sucrose synthase OS=Alnus glutinosa                                                      | 1013.95  | 16.19 % | 12 | 91.6  | 6.81 |
|                 | P29197 | Chaperonin CPN60, mitochondrial OS=Arabidopsis thaliana                                  | 982.58   | 23.74 % | 16 | 61.2  | 5.78 |
|                 | P24095 | Seed linoleate 9S-lipoxygenase OS=Glycine max                                            | 967.96   | 15.97 % | 14 | 96.8  | 6.15 |
|                 | P09918 | Seed linoleate 9S-lipoxygenase-3 OS=Pisum sativum                                        | 962.82   | 13.59 % | 10 | 97.6  | 6.51 |
|                 | Q84WU2 | Ubiquitin carboxyl-terminal hydrolase 13 OS=Arabidopsis thaliana                         | 955.77   | 13.00 % | 15 | 130.6 | 5.58 |
|                 | P09439 | Seed linoleate 9S-lipoxygenase-2 OS=Glycine max                                          | 918.68   | 15.95 % | 13 | 97.1  | 6.74 |
|                 | Q43117 | Pyruvate kinase isozyme A, chloroplastic OS=Ricinus communis                             | 864.76   | 25.56 % | 11 | 64.1  | 5.57 |
|                 | Q9FPT1 | Ubiquitin carboxyl-terminal hydrolase 12 OS=Arabidopsis thaliana                         | 783.28   | 11.92 % | 14 | 130.5 | 5.77 |
|                 | P49039 | Sucrose synthase OS=Solanum tuberosum                                                    | 781.74   | 18.26 % | 12 | 92.5  | 6.40 |
|                 | P50249 | Adenosylhomocysteinase OS=Phalaenopsis sp.                                               | 760.11   | 28.04 % | 15 | 53.1  | 6.14 |
|                 | Q9S9N1 | Heat shock 70 kDa protein 5 OS=Arabidopsis thaliana                                      | 750.65   | 17.34 % | 8  | 70.9  | 5.41 |
|                 | P09186 | Seed linoleate 9S-lipoxygenase-3 OS=Glycine max                                          | 748.93   | 12.02 % | 11 | 96.7  | 6.73 |
|                 | P07218 | Phenylalanine ammonia-lyase class 1 (Fragment) OS=Phaseolus vulgaris                     | 736.64   | 36.76 % | 14 | 55.8  | 6.07 |
|                 | Q39659 | Glyoxysomal fatty acid beta-oxidation multifunctional protein MFP-a OS=Cucumis sativus   | 724.33   | 8.41 %  | 5  | 79.1  | 9.07 |
|                 | Q23255 | Adenosylhomocysteinase 1 OS=Arabidopsis thaliana                                         | 723.35   | 33.61 % | 15 | 53.3  | 5.97 |
|                 | P93253 | Adenosylhomocysteinase OS=Mesembryanthemum crystallinum                                  | 711.51   | 33.40 % | 15 | 53.1  | 6.10 |
|                 | Q9FLW9 | Plastidial pyruvate kinase 2 OS=Arabidopsis thaliana                                     | 697.68   | 25.56 % | 11 | 63.5  | 7.03 |
|                 | Q43155 | Ferredoxin-dependent glutamate synthase, chloroplastic OS=Spinacia oleracea              | 692.68   | 10.09 % | 13 | 165.3 | 6.19 |
|                 | P45732 | Phenylalanine ammonia-lyase OS=Stylosanthes humilis                                      | 685.17   | 22.94 % | 12 | 77.9  | 6.49 |
|                 | P27991 | Phenylalanine ammonia-lyase 1 OS=Glycine max                                             | 664.2    | 22.44 % | 13 | 77.7  | 6.42 |
|                 | P37225 | NAD-dependent malic enzyme 59 kDa isoform, mitochondrial OS=Solanum tuberosum            | 647.68   | 16.31 % | 9  | 66.2  | 6.34 |
|                 | Q9MAH0 | Phosphoenolpyruvate carboxylase 1 OS=Arabidopsis thaliana                                | 646.68   | 17.99 % | 14 | 110.2 | 6.06 |
|                 | P49040 | Sucrose synthase 1 OS=Arabidopsis thaliana                                               | 620.46   | 19.68 % | 10 | 92.9  | 6.20 |
|                 | P21342 | Pyrophosphate--fructose 6-phosphate 1-phosphotransferase subunit alpha OS=Solanum        | 619.82   | 13.31 % | 6  | 67.3  | 7.43 |
|                 | Q31674 | Ribulose biphosphate carboxylase large chain (Fragment) OS=Anemia mexicana               | 617.13   | 20.71 % | 9  | 46.5  | 7.02 |

|        |                                                                                           |        |         |    |       |      |
|--------|-------------------------------------------------------------------------------------------|--------|---------|----|-------|------|
| Q9ZNZ7 | Ferredoxin-dependent glutamate synthase 1, chloroplastic/mitochondrial OS=Arabidopsis     | 610.13 | 8.26 %  | 10 | 176.6 | 6.32 |
| Q75NZ0 | Sulfite reductase [ferredoxin], chloroplastic OS=Pisum sativum                            | 606.32 | 11.68 % | 7  | 76.9  | 9.03 |
| P52780 | Glutamine--tRNA ligase OS=Lupinus luteus                                                  | 606.25 | 15.87 % | 12 | 90.4  | 6.76 |
| Q9LF33 | UDP-glucose 6-dehydrogenase 3 OS=Arabidopsis thaliana                                     | 549.13 | 27.92 % | 10 | 53.1  | 6.04 |
| Q9MAJ7 | Beta-galactosidase 5 OS=Arabidopsis thaliana                                              | 530.24 | 8.74 %  | 5  | 81.4  | 8.25 |
| Q41608 | Sucrose synthase 1 OS= Tulipa gesneriana                                                  | 522.52 | 8.32 %  | 6  | 92.2  | 6.57 |
| P0CG84 | Polyubiquitin (Fragment) OS=Nicotiana glauca                                              | 506.64 | 62.33 % | 4  | 42.2  | 7.58 |
| Q08276 | Heat shock 70 kDa protein, mitochondrial OS=Solanum tuberosum                             | 496.73 | 15.40 % | 8  | 73.0  | 6.76 |
| P43210 | Delta-aminolevulinic acid dehydratase, chloroplastic OS=Glycine max                       | 494.22 | 36.17 % | 10 | 45.0  | 7.09 |
| P35007 | Adenosylhomocysteinase OS=Catharanthus roseus                                             | 490.1  | 20.82 % | 12 | 53.2  | 5.88 |
| Q9T0P4 | Ferredoxin-dependent glutamate synthase 2, chloroplastic OS=Arabidopsis thaliana          | 475.57 | 6.08 %  | 8  | 177.6 | 7.01 |
| Q07356 | 15-cis-phytoene desaturase, chloroplastic/chromoplastic OS=Arabidopsis thaliana           | 474.18 | 24.03 % | 10 | 62.9  | 6.48 |
| P37221 | NAD-dependent malic enzyme 62 kDa isoform, mitochondrial OS=Solanum tuberosum             | 460.33 | 15.81 % | 8  | 69.9  | 5.94 |
| Q9SCV9 | Beta-galactosidase 3 OS=Arabidopsis thaliana                                              | 451.59 | 10.98 % | 8  | 95.1  | 7.21 |
| P86387 | Phospholipase D alpha 1 OS=Carica papaya                                                  | 446.74 | 10.64 % | 8  | 92.0  | 5.80 |
| Q9SD39 | Probable methyltransferase PMT27 OS=Arabidopsis thaliana                                  | 445.89 | 7.82 %  | 6  | 101.4 | 5.52 |
| Q9M568 | Phenylalanine ammonia-lyase 1 OS=Rubus idaeus                                             | 440.3  | 11.69 % | 8  | 77.7  | 6.67 |
| Q43621 | Glutathione reductase, cytosolic OS=Pisum sativum                                         | 430.3  | 11.45 % | 4  | 53.9  | 7.01 |
| P26969 | Glycine dehydrogenase (decarboxylating), mitochondrial OS=Pisum sativum                   | 424.52 | 15.89 % | 11 | 114.6 | 7.50 |
| Q94IR2 | Carotenoid 9,10(9',10')-cleavage dioxygenase 1 OS=Phaseolus vulgaris                      | 424.4  | 25.41 % | 10 | 61.1  | 6.54 |
| P10691 | Sucrose synthase OS=Solanum tuberosum                                                     | 421.76 | 8.20 %  | 7  | 92.4  | 6.21 |
| P93736 | Valine--tRNA ligase OS=Arabidopsis thaliana                                               | 420.95 | 5.87 %  | 8  | 125.8 | 7.11 |
| P25872 | Phenylalanine ammonia-lyase OS=Nicotiana tabacum                                          | 414    | 17.76 % | 9  | 77.7  | 6.77 |
| P29828 | Protein disulfide-isomerase OS=Medicago sativa                                            | 404.42 | 24.41 % | 9  | 57.1  | 5.10 |
| Q9LIA8 | UDP-glucose 6-dehydrogenase 2 OS=Arabidopsis thaliana                                     | 402.31 | 28.33 % | 10 | 53.1  | 6.00 |
| Q40545 | Pyruvate kinase isozyme A, chloroplastic OS=Nicotiana tabacum                             | 401.99 | 10.12 % | 6  | 65.2  | 5.39 |
| O82802 | Sulfite reductase 1 [ferredoxin], chloroplastic OS=Nicotiana tabacum                      | 399.51 | 11.69 % | 9  | 77.9  | 9.04 |
| Q42560 | Aconitate hydratase 1 OS=Arabidopsis thaliana                                             | 391.58 | 16.04 % | 9  | 98.1  | 6.40 |
| Q9LIK0 | Plastidial pyruvate kinase 1, chloroplastic OS=Arabidopsis thaliana                       | 391.04 | 13.09 % | 6  | 65.1  | 5.92 |
| P0DH99 | Elongation factor 1-alpha 1 OS=Arabidopsis thaliana                                       | 385.86 | 19.38 % | 8  | 49.5  | 9.11 |
| P28553 | Phytoene dehydrogenase, chloroplastic/chromoplastic OS=Glycine max                        | 381.89 | 20.53 % | 9  | 63.6  | 7.43 |
| Q8W0A1 | Beta-galactosidase 2 OS=Oryza sativa subsp. japonica                                      | 374.46 | 10.76 % | 7  | 91.5  | 5.90 |
| Q41607 | Sucrose synthase 2 OS= Tulipa gesneriana                                                  | 370.63 | 7.20 %  | 6  | 93.0  | 6.38 |
| P08824 | RuBisCO large subunit-binding protein subunit alpha (Fragment) OS=Ricinus communis        | 363.67 | 12.32 % | 5  | 52.3  | 4.87 |
| P25698 | Elongation factor 1-alpha OS=Glycine max                                                  | 349.43 | 17.67 % | 7  | 49.3  | 9.06 |
| P93400 | Phospholipase D alpha 1 OS=Nicotiana tabacum                                              | 347.56 | 7.18 %  | 5  | 91.9  | 5.63 |
| P12628 | NADP-dependent malic enzyme OS=Phaseolus vulgaris                                         | 339.34 | 20.03 % | 11 | 64.9  | 6.86 |
| O04379 | Protein argonaute 1 OS=Arabidopsis thaliana                                               | 336.36 | 8.02 %  | 7  | 116.1 | 9.29 |
| Q9SF16 | T-complex protein 1 subunit eta OS=Arabidopsis thaliana                                   | 330.72 | 16.16 % | 9  | 59.7  | 6.39 |
| Q9LEI9 | Enolase 2 OS=Hevea brasiliensis                                                           | 326.03 | 17.75 % | 6  | 47.9  | 6.29 |
| O49954 | Glycine dehydrogenase (decarboxylating), mitochondrial OS=Solanum tuberosum               | 317.02 | 11.88 % | 9  | 112.8 | 6.98 |
| Q6K669 | Leucine aminopeptidase 2, chloroplastic OS=Oryza sativa subsp. japonica                   | 303.63 | 11.54 % | 6  | 61.8  | 8.10 |
| O82549 | Phospholipase D alpha 1 OS=Brassica oleracea var. capitata                                | 301.42 | 8.52 %  | 7  | 91.8  | 5.86 |
| P42896 | Enolase OS=Ricinus communis                                                               | 299.69 | 17.98 % | 6  | 47.9  | 5.78 |
| Q40079 | V-type proton ATPase subunit B 2 OS=Hordeum vulgare                                       | 297.68 | 18.84 % | 8  | 53.7  | 5.24 |
| O82191 | NADP-dependent malic enzyme 1 OS=Arabidopsis thaliana                                     | 291.53 | 16.18 % | 8  | 64.2  | 6.76 |
| P21239 | RuBisCO large subunit-binding protein subunit alpha, chloroplastic (Fragment) OS=Brassica | 289    | 13.00 % | 4  | 57.7  | 4.93 |
| Q7XSA2 | Protein argonaute 1B OS=Oryza sativa subsp. japonica                                      | 287.33 | 9.57 %  | 8  | 123.5 | 9.50 |
| Q39256 | Polyubiquitin 8 OS=Arabidopsis thaliana                                                   | 284.72 | 9.19 %  | 4  | 71.7  | 9.03 |
| P08170 | Seed linoleate 13S-lipoxygenase-1 OS=Glycine max                                          | 283.27 | 9.42 %  | 7  | 94.3  | 6.39 |
| Q9FL12 | Protease Do-like 9 OS=Arabidopsis thaliana                                                | 280.22 | 9.80 %  | 5  | 65.1  | 6.81 |
| P29409 | Phosphoglycerate kinase, chloroplastic (Fragment) OS=Spinacia oleracea                    | 279.64 | 26.10 % | 8  | 45.5  | 6.16 |
| P51615 | NADP-dependent malic enzyme OS=Vitis vinifera                                             | 279.33 | 17.43 % | 9  | 65.2  | 6.49 |
| Q9LV33 | Beta-glucosidase 44 OS=Arabidopsis thaliana                                               | 278.46 | 8.40 %  | 5  | 58.9  | 9.42 |
| Q8L7V3 | Probable methyltransferase PMT26 OS=Arabidopsis thaliana                                  | 275.02 | 7.84 %  | 6  | 93.0  | 5.16 |
| Q9C9K3 | Pyrophosphate--fructose 6-phosphate 1-phosphotransferase subunit alpha 2 OS=Arabido       | 274.65 | 11.18 % | 5  | 67.5  | 7.23 |
| P19143 | Phenylalanine ammonia-lyase class 3 OS=Phaseolus vulgaris                                 | 274.48 | 12.39 % | 7  | 77.9  | 5.72 |
| Q8RU27 | Alpha-1,4-glucan-protein synthase [UDP-forming] 2 OS=Solanum tuberosum                    | 273    | 21.58 % | 6  | 41.6  | 6.07 |
| Q9LEJ0 | Enolase 1 OS=Hevea brasiliensis                                                           | 270.33 | 16.40 % | 5  | 47.8  | 5.80 |
| Q38931 | Peptidyl-prolyl cis-trans isomerase FKBP62 OS=Arabidopsis thaliana                        | 268.34 | 8.17 %  | 6  | 61.4  | 5.31 |
| Q0WT31 | Probable methyltransferase PMT25 OS=Arabidopsis thaliana                                  | 266.75 | 6.36 %  | 5  | 86.8  | 5.40 |
| O80988 | Glycine dehydrogenase (decarboxylating) 2, mitochondrial OS=Arabidopsis thaliana          | 265.7  | 10.44 % | 8  | 113.7 | 6.65 |
| Q43130 | Enolase OS=Mesembryanthemum crystallinum                                                  | 262.15 | 9.68 %  | 5  | 48.3  | 5.85 |
| Q9SS45 | Phenylalanine ammonia-lyase 4 OS=Arabidopsis thaliana                                     | 256.35 | 14.71 % | 8  | 76.9  | 6.27 |
| Q42962 | Phosphoglycerate kinase, cytosolic OS=Nicotiana tabacum                                   | 256.16 | 20.45 % | 7  | 42.3  | 5.97 |
| P42066 | Phosphoenolpyruvate carboxykinase [ATP] OS=Cucumis sativus                                | 255.97 | 10.45 % | 6  | 74.4  | 6.54 |
| O49485 | D-3-phosphoglycerate dehydrogenase 1, chloroplastic OS=Arabidopsis thaliana               | 254.55 | 10.12 % | 6  | 63.3  | 6.58 |
| P34105 | NADP-dependent malic enzyme OS=Populus trichocarpa                                        | 252.52 | 17.60 % | 8  | 65.2  | 6.96 |
| Q9XGW1 | Protein argonaute 10 OS=Arabidopsis thaliana                                              | 244.02 | 5.77 %  | 5  | 110.8 | 9.23 |
| Q9SGY2 | ATP-citrate synthase alpha chain protein 1 OS=Arabidopsis thaliana                        | 243.14 | 9.69 %  | 5  | 46.6  | 5.50 |
| Q8L7K9 | NAD-dependent malic enzyme 2, mitochondrial OS=Arabidopsis thaliana                       | 242.63 | 11.86 % | 9  | 66.6  | 7.06 |
| Q43321 | Enolase OS=Alnus glutinosa                                                                | 239.37 | 14.77 % | 4  | 47.6  | 5.58 |
| Q9SN95 | UDP-glucuronic acid decarboxylase 5 OS=Arabidopsis thaliana                               | 231.7  | 17.89 % | 6  | 38.4  | 7.52 |
| Q42919 | Glucose-6-phosphate 1-dehydrogenase, cytoplasmic isoform OS=Medicago sativa               | 229.64 | 17.86 % | 7  | 58.9  | 6.21 |
| Q40024 | Betaine aldehyde dehydrogenase OS=Hordeum vulgare                                         | 226.47 | 9.31 %  | 3  | 54.3  | 6.18 |
| Q84XU2 | Serine/threonine-protein phosphatase 5 OS=Arabidopsis thaliana                            | 226.4  | 9.85 %  | 4  | 60.2  | 6.84 |



|               |                                                                                                              |               |               |          |              |             |
|---------------|--------------------------------------------------------------------------------------------------------------|---------------|---------------|----------|--------------|-------------|
| Q9S7C0        | Heat shock 70 kDa protein 14 OS=Arabidopsis thaliana                                                         | 226.3         | 4.33 %        | 4        | 91.7         | 5.25        |
| Q40546        | Pyruvate kinase isozyme G, chloroplastic OS=Nicotiana tabacum                                                | 225.44        | 9.25 %        | 6        | 61.8         | 7.53        |
| P55964        | Pyruvate kinase isozyme G, chloroplastic (Fragment) OS=Ricinus communis                                      | 221.3         | 8.37 %        | 3        | 46.0         | 6.58        |
| Q6ESI7        | Tripeptidyl-peptidase 2 OS=Oryza sativa subsp. japonica                                                      | 220.94        | 3.31 %        | 5        | 148.5        | 6.58        |
| Q8VZC3        | Delta-1-pyrroline-5-carboxylate dehydrogenase 12A1, mitochondrial OS=Arabidopsis thaliana                    | 219.92        | 9.89 %        | 6        | 61.7         | 6.73        |
| P34094        | Phytochrome B OS=Solanum tuberosum                                                                           | 219.12        | 4.25 %        | 4        | 125.3        | 6.04        |
| Q9T074        | Phosphoenolpyruvate carboxykinase [ATP] OS=Arabidopsis thaliana                                              | 216.81        | 8.05 %        | 4        | 73.4         | 7.08        |
| Q944P7        | Leucine aminopeptidase 3, chloroplastic OS=Arabidopsis thaliana                                              | 215.47        | 9.09 %        | 5        | 61.3         | 7.08        |
| Q9SFH9        | Delta-aminolevulinic acid dehydratase 1, chloroplastic OS=Arabidopsis thaliana                               | 213.64        | 16.98 %       | 5        | 46.7         | 7.31        |
| Q9SLZ0        | Phosphoenolpyruvate carboxykinase [ATP] OS=Zea mays                                                          | 213.62        | 10.66 %       | 5        | 73.3         | 7.03        |
| O04883        | Phospholipase D alpha 1 OS=Pimpinella brachycarpa                                                            | 211.09        | 3.96 %        | 4        | 91.6         | 6.11        |
| Q43207        | 70 kDa peptidyl-prolyl isomerase OS=Triticum aestivum                                                        | 203.9         | 6.62 %        | 5        | 62.0         | 5.40        |
| O82261        | Protease Do-like 2, chloroplastic OS=Arabidopsis thaliana                                                    | 202.93        | 6.26 %        | 3        | 66.8         | 6.05        |
| Q93ZM7        | Chaperonin CPN60-like 2, mitochondrial OS=Arabidopsis thaliana                                               | 202.38        | 7.17 %        | 3        | 60.4         | 6.10        |
| P00865        | Ribulose biphosphate carboxylase small chain 1, chloroplastic OS=Glycine max                                 | 199.02        | 13.48 %       | 3        | 20.1         | 8.66        |
| P51850        | Pyruvate decarboxylase 1 OS=Pisum sativum                                                                    | 197.74        | 6.91 %        | 4        | 63.9         | 5.72        |
| F4JVN6        | Tripeptidyl-peptidase 2 OS=Arabidopsis thaliana                                                              | 196.55        | 3.41 %        | 4        | 152.3        | 6.07        |
| B3VMC0        | Betaine aldehyde dehydrogenase 2 OS=Oryza sativa subsp. indica                                               | 196.25        | 8.95 %        | 3        | 54.6         | 5.45        |
| Q9ZPI5        | Peroxisomal fatty acid beta-oxidation multifunctional protein MFP2 OS=Arabidopsis thaliana                   | 195.16        | 4.69 %        | 4        | 78.8         | 9.17        |
| Q9M8D3        | Probable phosphoribosylformylglycinamide synthase, chloroplastic/mitochondrial OS=Arabidopsis thaliana       | 193.68        | 2.99 %        | 3        | 153.9        | 5.36        |
| Q5QMT0        | Beta-glucosidase 1 OS=Oryza sativa subsp. japonica                                                           | 193.09        | 5.04 %        | 4        | 58.0         | 8.27        |
| O24076        | Guanine nucleotide-binding protein subunit beta-like protein OS=Medicago sativa                              | 192.94        | 16.00 %       | 5        | 35.6         | 7.44        |
| Q9FFT4        | Pyruvate decarboxylase 2 OS=Arabidopsis thaliana                                                             | 192.15        | 6.59 %        | 4        | 65.8         | 5.96        |
| P42499        | Phytochrome B OS=Glycine max                                                                                 | 191.39        | 5.54 %        | 5        | 129.0        | 6.28        |
| Q9AXQ8        | Deoxyhypusine synthase OS=Dianthus caryophyllus                                                              | 191.24        | 12.87 %       | 4        | 41.1         | 5.83        |
| F4JLI5        | Xanthine dehydrogenase 2 OS=Arabidopsis thaliana                                                             | 191.03        | 3.47 %        | 4        | 148.7        | 6.73        |
| P55826        | Protopyrrophinogen oxidase 1, chloroplastic OS=Arabidopsis thaliana                                          | 190.58        | 8.19 %        | 3        | 57.7         | 9.03        |
| P43279        | NADP-dependent malic enzyme, chloroplastic OS=Oryza sativa subsp. japonica                                   | 189.23        | 10.95 %       | 5        | 69.8         | 7.14        |
| Q9LV34        | Beta-glucosidase 43 OS=Arabidopsis thaliana                                                                  | 188.22        | 5.19 %        | 4        | 57.2         | 7.25        |
| P31300        | Cysteine synthase, chloroplastic/chromoplastic OS=Capsicum annuum                                            | 188.08        | 12.57 %       | 3        | 40.0         | 5.27        |
| Q06060        | Mitogen-activated protein kinase homolog D5 OS=Pisum sativum                                                 | 186.42        | 17.77 %       | 4        | 45.1         | 5.73        |
| Q9CAG3        | Lipoxygenase 6, chloroplastic OS=Arabidopsis thaliana                                                        | 184.49        | 4.91 %        | 3        | 104.4        | 7.88        |
| Q8H0S9        | Puromycin-sensitive aminopeptidase OS=Arabidopsis thaliana                                                   | 182.53        | 6.12 %        | 5        | 99.1         | 5.67        |
| P02581        | Actin-1 OS=Glycine max                                                                                       | 178.66        | 14.32 %       | 3        | 41.3         | 5.58        |
| P08927        | RuBisCO large subunit-binding protein subunit beta, chloroplastic OS=Pisum sativum                           | 177.79        | 6.89 %        | 4        | 62.9         | 6.04        |
| P54765        | GTP-binding nuclear protein Ran1A (Fragment) OS=Lotus japonicus                                              | 176.47        | 28.23 %       | 6        | 23.8         | 7.12        |
| P37224        | NAD-dependent malic enzyme 65 kDa isoform, mitochondrial OS=Amaranthus hypochondriacus                       | 174.57        | 9.47 %        | 4        | 69.6         | 5.91        |
| Q43191        | Probable linoleate 9S-lipoxygenase 5 OS=Solanum tuberosum                                                    | 170.75        | 5.22 %        | 5        | 97.7         | 5.81        |
| Q0JLS6        | Protein ROOT HAIR DEFECTIVE 3 OS=Oryza sativa subsp. japonica                                                | 169.41        | 4.71 %        | 5        | 90.4         | 6.15        |
| Q9LSH2        | Glutamate decarboxylase 5 OS=Arabidopsis thaliana                                                            | 168.69        | 10.12 %       | 4        | 55.7         | 5.66        |
| P55195        | Phosphoribosylaminoimidazole carboxylase, chloroplastic (Fragment) OS=Vigna aconitifolia                     | 167.52        | 7.72 %        | 3        | 60.9         | 6.42        |
| O22607        | WD-40 repeat-containing protein MSI4 OS=Arabidopsis thaliana                                                 | 166.73        | 14.99 %       | 4        | 55.7         | 6.23        |
| Q43468        | Hsp70-Hsp90 organizing protein 1 OS=Glycine max                                                              | 162.95        | 6.99 %        | 3        | 64.1         | 5.69        |
| <b>O24370</b> | <b>Linoleate 13S-lipoxygenase 2-1, chloroplastic OS=Solanum tuberosum</b>                                    | <b>161.16</b> | <b>2.89 %</b> | <b>3</b> | <b>101.9</b> | <b>6.55</b> |
| Q9LJE4        | Chaperonin 60 subunit beta 2, chloroplastic OS=Arabidopsis thaliana                                          | 160.17        | 7.21 %        | 4        | 63.3         | 5.73        |
| Q39836        | Guanine nucleotide-binding protein subunit beta-like protein OS=Glycine max                                  | 157.57        | 13.85 %       | 5        | 35.6         | 7.72        |
| Q339X2        | Beta-glucosidase 34 OS=Oryza sativa subsp. japonica                                                          | 156.76        | 6.08 %        | 3        | 58.0         | 6.67        |
| Q940P8        | T-complex protein 1 subunit beta OS=Arabidopsis thaliana                                                     | 156.26        | 11.01 %       | 4        | 57.2         | 5.87        |
| P24007        | Ribulose biphosphate carboxylase small chain, chloroplastic OS=Pyrus pyrifolia                               | 153.84        | 14.75 %       | 3        | 20.5         | 8.87        |
| P26301        | Enolase 1 OS=Zea mays                                                                                        | 149.43        | 14.80 %       | 6        | 48.0         | 5.33        |
| Q42521        | Glutamate decarboxylase 1 OS=Arabidopsis thaliana                                                            | 149.41        | 15.34 %       | 4        | 57.0         | 5.53        |
| Q6Z382        | Coatomer subunit gamma-2 OS=Oryza sativa subsp. japonica                                                     | 149.12        | 3.71 %        | 2        | 98.5         | 5.11        |
| Q6RJS2        | Deoxyhypusine synthase OS=Brassica napus                                                                     | 148.83        | 13.86 %       | 5        | 41.1         | 5.50        |
| Q6K972        | Protein argonaute 1C OS=Oryza sativa subsp. japonica                                                         | 148.37        | 3.56 %        | 3        | 113.1        | 9.50        |
| Q6Y2X6        | Putative aconitate hydratase, cytoplasmic OS=Oryza sativa subsp. japonica                                    | 147.95        | 6.24 %        | 5        | 98.0         | 6.01        |
| P84577        | Putative heat shock protein HSP90 (Fragments) OS=Populus euphratica                                          | 146.25        | 59.57 %       | 2        | 5.1          | 4.03        |
| Q69Q02        | 4-alpha-glucanotransferase DPE2 OS=Oryza sativa subsp. japonica                                              | 146.22        | 3.28 %        | 3        | 108.2        | 6.40        |
| Q43154        | Glutathione reductase, chloroplastic (Fragment) OS=Spinacia oleracea                                         | 144.65        | 9.61 %        | 4        | 52.6         | 5.72        |
| P26302        | Phosphoribulokinase, chloroplastic OS=Triticum aestivum                                                      | 143.63        | 13.12 %       | 3        | 45.1         | 6.05        |
| Q6ZDY8        | Succinate dehydrogenase [ubiquinone] flavoprotein subunit, mitochondrial OS=Oryza sativa                     | 143.54        | 6.03 %        | 3        | 68.8         | 7.08        |
| P93028        | Ubiquitin-activating enzyme E1 1 OS=Arabidopsis thaliana                                                     | 143.29        | 5.46 %        | 5        | 120.2        | 5.27        |
| Q9CA83        | NADP-dependent malic enzyme 4, chloroplastic OS=Arabidopsis thaliana                                         | 140.8         | 11.46 %       | 5        | 71.1         | 6.58        |
| Q9SGE0        | UDP-D-apirose/UDP-D-xylose synthase 2 OS=Arabidopsis thaliana                                                | 139.63        | 16.71 %       | 5        | 43.8         | 5.87        |
| P36875        | Protein phosphatase PP2A regulatory subunit A (Fragment) OS=Pisum sativum                                    | 139.55        | 16.96 %       | 4        | 43.9         | 5.17        |
| Q69VD5        | Protein argonaute PNH1 OS=Oryza sativa subsp. japonica                                                       | 137.98        | 4.80 %        | 3        | 108.3        | 9.20        |
| P52588        | Protein disulfide-isomerase OS=Zea mays                                                                      | 137.39        | 6.82 %        | 4        | 57.1         | 5.41        |
| P25697        | Phosphoribulokinase, chloroplastic OS=Arabidopsis thaliana                                                   | 137.26        | 11.90 %       | 3        | 44.4         | 6.05        |
| Q94K05        | T-complex protein 1 subunit theta OS=Arabidopsis thaliana                                                    | 137.03        | 6.56 %        | 3        | 58.9         | 5.35        |
| Q9SU63        | Aldehyde dehydrogenase family 2 member B4, mitochondrial OS=Arabidopsis thaliana                             | 135.06        | 6.13 %        | 3        | 58.6         | 7.46        |
| Q42536        | Protochlorophyllide reductase A, chloroplastic OS=Arabidopsis thaliana                                       | 134.89        | 10.12 %       | 4        | 43.8         | 9.36        |
| P92974        | Ubiquitin-activating enzyme E1 2 OS=Arabidopsis thaliana                                                     | 133.2         | 4.92 %        | 5        | 119.5        | 5.29        |
| Q53JY8        | ATP-citrate synthase subunit alpha chain protein 1 OS=Oryza sativa subsp. japonica                           | 132.45        | 12.53 %       | 4        | 45.0         | 6.07        |
| B9SQI7        | Probable bifunctional methylthioribulose-1-phosphate dehydratase/enolase-phosphatase OS=Arabidopsis thaliana | 130.87        | 4.17 %        | 2        | 57.7         | 6.00        |
| P17202        | Betaine aldehyde dehydrogenase, chloroplastic OS=Spinacia oleracea                                           | 128.91        | 4.63 %        | 2        | 54.2         | 5.41        |
| P51846        | Pyruvate decarboxylase 2 OS=Nicotiana tabacum                                                                | 128.21        | 5.54 %        | 3        | 67.0         | 5.96        |
| Q53RB0        | Probable linoleate 9S-lipoxygenase 4 OS=Oryza sativa subsp. japonica                                         | 127.7         | 4.45 %        | 4        | 98.6         | 7.31        |

|        |                                                                                                  |        |         |   |       |      |
|--------|--------------------------------------------------------------------------------------------------|--------|---------|---|-------|------|
| Q84WV1 | T-complex protein 1 subunit gamma OS=Arabidopsis thaliana                                        | 126.72 | 5.95 %  | 3 | 60.3  | 5.77 |
| Q93VK5 | Protein LUTEIN DEFICIENT 5, chloroplastic OS=Arabidopsis thaliana                                | 125.6  | 4.54 %  | 2 | 66.8  | 6.13 |
| Q9XF61 | Protein disulfide-isomerase OS=Datiscia glomerata                                                | 125.08 | 6.11 %  | 2 | 57.1  | 4.93 |
| Q41638 | Xyloglucan endotransglucosylase/hydrolase protein A OS=Phaseolus angularis                       | 123.95 | 10.27 % | 2 | 33.9  | 7.42 |
| Q03460 | Glutamate synthase [NADH], amyloplastic OS=Medicago sativa                                       | 121.76 | 1.91 %  | 4 | 240.2 | 6.27 |
| Q2QLY4 | 5-methyltetrahydropteroyltryglutamate--homocysteine methyltransferase 2 OS=Oryza sativa          | 120.22 | 5.35 %  | 4 | 84.6  | 6.30 |
| Q94A28 | Aconitate hydratase 3, mitochondrial OS=Arabidopsis thaliana                                     | 119.82 | 4.92 %  | 4 | 108.4 | 7.15 |
| Q9M055 | Isomylase 3, chloroplastic OS=Arabidopsis thaliana                                               | 119.74 | 2.88 %  | 2 | 86.3  | 6.05 |
| Q9FGY1 | Beta-D-xylosidase 1 OS=Arabidopsis thaliana                                                      | 118.35 | 2.71 %  | 2 | 83.5  | 8.51 |
| O22518 | 40S ribosomal protein SA OS=Glycine max                                                          | 117.82 | 10.32 % | 3 | 33.9  | 5.26 |
| A2XA23 | Alcohol dehydrogenase class-3 OS=Oryza sativa subsp. indica                                      | 116.37 | 7.61 %  | 2 | 40.8  | 7.17 |
| Q9SVN5 | Probable methionine--tRNA ligase OS=Arabidopsis thaliana                                         | 115.39 | 4.52 %  | 4 | 89.8  | 7.01 |
| Q93253 | Plastidial pyruvate kinase 3, chloroplastic OS=Arabidopsis thaliana                              | 115.05 | 7.18 %  | 4 | 62.6  | 7.81 |
| Q96482 | Actin-41 (Fragment) OS=Solanum lycopersicum                                                      | 113.77 | 11.90 % | 2 | 37.1  | 5.69 |
| Q9S795 | Betaine aldehyde dehydrogenase 1, chloroplastic OS=Arabidopsis thaliana                          | 113.44 | 4.99 %  | 2 | 54.4  | 5.29 |
| Q9SM24 | Alpha-aminoacidipic semialdehyde synthase OS=Arabidopsis thaliana                                | 113.37 | 2.63 %  | 3 | 117.1 | 6.05 |
| F4JJJ3 | External alternative NAD(P)H-ubiquinone oxidoreductase B3, mitochondrial OS=Arabidopsis thaliana | 113.11 | 6.72 %  | 3 | 65.1  | 8.35 |
| Q9C7N2 | MACPF domain-containing protein CAD1 OS=Arabidopsis thaliana                                     | 112.91 | 4.46 %  | 2 | 62.2  | 8.05 |
| Q9LV21 | T-complex protein 1 subunit delta OS=Arabidopsis thaliana                                        | 112.16 | 7.46 %  | 3 | 57.7  | 7.68 |
| P37830 | Glucose-6-phosphate 1-dehydrogenase, cytoplasmic isoform OS=Solanum tuberosum                    | 111.74 | 5.48 %  | 3 | 58.4  | 6.34 |
| P15252 | Rubber elongation factor protein OS=Hevea brasiliensis                                           | 111.51 | 31.88 % | 3 | 14.7  | 5.19 |
| P17562 | S-adenosylmethionine synthase 2 OS=Arabidopsis thaliana                                          | 109.9  | 13.23 % | 3 | 43.2  | 6.06 |
| O04130 | D-3-phosphoglycerate dehydrogenase 2, chloroplastic OS=Arabidopsis thaliana                      | 105.89 | 4.65 %  | 3 | 66.4  | 6.13 |
| P38661 | Probable protein disulfide-isomerase A6 OS=Medicago sativa                                       | 105.52 | 6.04 %  | 2 | 40.5  | 5.59 |
| Q9C550 | 2-isopropylmalate synthase 2, chloroplastic OS=Arabidopsis thaliana                              | 105.04 | 6.02 %  | 2 | 68.1  | 6.37 |
| Q9FKE9 | Protein ROOT HAIR DEFECTIVE 3 homolog 2 OS=Arabidopsis thaliana                                  | 104.57 | 4.08 %  | 4 | 93.5  | 6.29 |
| Q43011 | Asparagine synthetase [glutamine-hydrolyzing] 2 OS=Oryza sativa subsp. japonica                  | 100.69 | 4.57 %  | 2 | 66.2  | 6.46 |
| P20973 | Ubiquitin-activating enzyme E1 1 OS=Triticum aestivum                                            | 100.29 | 4.19 %  | 4 | 116.9 | 5.31 |
| P31252 | Ubiquitin-activating enzyme E1 3 OS=Triticum aestivum                                            | 99.95  | 5.13 %  | 4 | 116.4 | 5.55 |
| Q9LF41 | Probable ubiquitin conjugation factor E4 OS=Arabidopsis thaliana                                 | 99.79  | 2.99 %  | 3 | 117.5 | 5.62 |
| Q9LPW7 | Protein AUXIN SIGNALING F-BOX 3 OS=Arabidopsis thaliana                                          | 99.14  | 7.28 %  | 4 | 64.9  | 7.21 |
| Q9LUW0 | Linoleate 9S-lipoxygenase 5, chloroplastic OS=Arabidopsis thaliana                               | 98.6   | 4.63 %  | 4 | 101.0 | 6.62 |
| O64879 | Beta-glucosidase 15 OS=Arabidopsis thaliana                                                      | 98.08  | 3.16 %  | 2 | 56.9  | 7.71 |
| Q41249 | Protochlorophyllide reductase, chloroplastic OS=Cucumis sativus                                  | 98.06  | 8.54 %  | 3 | 43.0  | 8.91 |
| Q06801 | 4-alpha-glucanotransferase, chloroplastic/amyloplastic OS=Solanum tuberosum                      | 96.84  | 4.86 %  | 2 | 64.9  | 5.48 |
| Q43593 | Acyl-[acyl-carrier-protein] desaturase, chloroplastic OS=Olea europaea                           | 95.34  | 5.90 %  | 2 | 44.6  | 6.55 |
| P38418 | Lipoxygenase 2, chloroplastic OS=Arabidopsis thaliana                                            | 94.75  | 2.34 %  | 2 | 102.0 | 5.62 |
| O81645 | Villin-3 OS=Arabidopsis thaliana                                                                 | 94.38  | 2.07 %  | 2 | 106.3 | 5.85 |
| Q9FZE0 | Beta-glucosidase 40 OS=Arabidopsis thaliana                                                      | 93.99  | 4.71 %  | 3 | 58.1  | 8.02 |
| Q9SJK3 | Protein argonaute 5 OS=Arabidopsis thaliana                                                      | 93.56  | 2.61 %  | 2 | 111.0 | 9.47 |
| P38414 | Linoleate 9S-lipoxygenase OS=Lens culinaris                                                      | 91.92  | 2.89 %  | 3 | 96.6  | 6.44 |
| Q9LFU1 | Asparagine synthetase [glutamine-hydrolyzing] 3 OS=Arabidopsis thaliana                          | 91.4   | 4.67 %  | 2 | 65.2  | 6.57 |
| O48921 | Cytochrome P450 97B2, chloroplastic OS=Glycine max                                               | 91.33  | 5.21 %  | 2 | 64.7  | 6.96 |
| Q9FJ15 | Glucose-6-phosphate 1-dehydrogenase, cytoplasmic isoform 2 OS=Arabidopsis thaliana               | 90.64  | 9.71 %  | 5 | 59.1  | 6.43 |
| Q9LIR4 | Dihydroxy-acid dehydratase, chloroplastic OS=Arabidopsis thaliana                                | 90.43  | 6.25 %  | 3 | 64.9  | 6.23 |
| Q9SGZ5 | Probable beta-D-xylosidase 7 OS=Arabidopsis thaliana                                             | 90.3   | 3.52 %  | 3 | 83.8  | 8.03 |
| Q8GXV5 | Ureidoglycine aminohydrolase OS=Arabidopsis thaliana                                             | 88.25  | 8.05 %  | 2 | 33.7  | 6.38 |
| Q40466 | Eukaryotic initiation factor 4A-13 (Fragment) OS=Nicotiana tabacum                               | 87.28  | 10.70 % | 4 | 40.2  | 5.33 |
| O23735 | Cysteine synthase OS=Brassica juncea                                                             | 85.31  | 9.88 %  | 3 | 34.1  | 5.59 |
| Q9LK23 | Glucose-6-phosphate 1-dehydrogenase, cytoplasmic isoform 1 OS=Arabidopsis thaliana               | 82.98  | 8.33 %  | 5 | 59.1  | 8.31 |
| O04450 | T-complex protein 1 subunit epsilon OS=Arabidopsis thaliana                                      | 82.91  | 3.74 %  | 2 | 59.3  | 5.66 |
| Q9M291 | Protein transport protein Sec24-like CEF OS=Arabidopsis thaliana                                 | 81.81  | 1.64 %  | 2 | 117.6 | 7.21 |
| O81154 | Cysteine synthase OS=Solanum tuberosum                                                           | 77.89  | 7.38 %  | 2 | 34.3  | 6.62 |
| P21218 | Protochlorophyllide reductase B, chloroplastic OS=Arabidopsis thaliana                           | 76.62  | 6.48 %  | 3 | 43.3  | 9.16 |
| Q0WVL7 | Golgin candidate 5 OS=Arabidopsis thaliana                                                       | 76.58  | 2.09 %  | 2 | 108.3 | 4.83 |
| P23686 | S-adenosylmethionine synthase 1 OS=Arabidopsis thaliana                                          | 75.13  | 15.01 % | 4 | 43.1  | 5.82 |
| O64765 | UDP-N-acetylglucosamine diphosphorylase 2 OS=Arabidopsis thaliana                                | 74.74  | 4.38 %  | 2 | 55.7  | 5.91 |
| O04916 | Aconitate hydratase, cytoplasmic (Fragment) OS=Solanum tuberosum                                 | 74.45  | 10.55 % | 3 | 67.1  | 6.44 |
| Q9LW29 | Protein AUXIN SIGNALING F-BOX 2 OS=Arabidopsis thaliana                                          | 74     | 4.17 %  | 3 | 64.6  | 7.37 |
| Q00834 | Cysteine synthase OS=Spinacia oleracea                                                           | 72.57  | 7.69 %  | 2 | 34.2  | 5.62 |
| Q2QTC2 | Phosphoglucan, water dikinase, chloroplastic OS=Oryza sativa subsp. japonica                     | 72.54  | 2.07 %  | 3 | 132.8 | 5.78 |
| A9RBS1 | Probable bifunctional methylthioribulose-1-phosphate dehydratase/enolase-phosphatase             | 72.11  | 4.55 %  | 3 | 55.4  | 6.49 |
| O22907 | DEAD-box ATP-dependent RNA helicase 24 OS=Arabidopsis thaliana                                   | 71.45  | 2.50 %  | 2 | 83.0  | 5.88 |
| Q42601 | Carbamoyl-phosphate synthase large chain, chloroplastic OS=Arabidopsis thaliana                  | 69.02  | 2.70 %  | 3 | 129.9 | 5.73 |
| P42500 | Phytochrome A OS=Glycine max                                                                     | 66.92  | 2.56 %  | 2 | 125.7 | 6.61 |
| P56821 | Eukaryotic translation initiation factor 3 subunit B OS=Nicotiana tabacum                        | 66.81  | 4.03 %  | 3 | 82.5  | 5.02 |
| M1BYJ7 | External alternative NAD(P)H-ubiquinone oxidoreductase B1, mitochondrial OS=Solanum tuberosum    | 66     | 4.68 %  | 2 | 65.1  | 6.49 |
| Q6ZY51 | Phosphoglucan, water dikinase, chloroplastic OS=Arabidopsis thaliana                             | 65.44  | 1.25 %  | 2 | 131.2 | 6.24 |
| Q38893 | Zeta-carotene desaturase, chloroplastic/chromoplastic OS=Arabidopsis thaliana                    | 65.25  | 3.76 %  | 2 | 61.6  | 7.37 |
| O23627 | Glycine--tRNA ligase 1, mitochondrial OS=Arabidopsis thaliana                                    | 63.85  | 3.16 %  | 3 | 81.9  | 7.01 |
| O49901 | Zeta-carotene desaturase, chloroplastic/chromoplastic OS=Narcissus pseudonarcissus               | 63.11  | 3.83 %  | 2 | 63.5  | 7.68 |
| Q9SDG8 | Protein argonaute 4A OS=Oryza sativa subsp. japonica                                             | 62.06  | 2.10 %  | 2 | 100.6 | 8.97 |
| Q8VZC0 | UDP-glucuronic acid decarboxylase 1 OS=Arabidopsis thaliana                                      | 61.95  | 5.06 %  | 2 | 48.6  | 9.16 |
| Q9M401 | Branched-chain-amino-acid aminotransferase 3, chloroplastic OS=Arabidopsis thaliana              | 61.12  | 6.30 %  | 3 | 44.9  | 8.10 |
| P30792 | 2,3-bisphosphoglycerate-independent phosphoglycerate mutase OS=Zea mays                          | 59.86  | 3.04 %  | 2 | 60.6  | 5.53 |
| O64882 | Beta-glucosidase 17 OS=Arabidopsis thaliana                                                      | 56.82  | 2.90 %  | 2 | 59.1  | 5.85 |

|        |                                                                                       |       |         |   |      |      |
|--------|---------------------------------------------------------------------------------------|-------|---------|---|------|------|
| P40115 | Cryptochrome-1 OS=Sinapis alba                                                        | 55.7  | 5.19 %  | 3 | 57.0 | 7.49 |
| O23813 | Sulfite reductase [ferredoxin], chloroplastic OS=Zea mays                             | 53.86 | 1.57 %  | 2 | 70.0 | 8.69 |
| Q9ZTR1 | Spermidine synthase 1 OS=Pisum sativum                                                | 52.5  | 7.78 %  | 2 | 36.7 | 5.11 |
| Q10D00 | ATP-dependent RNA helicase SUV3, mitochondrial OS=Oryza sativa subsp. japonica        | 52.34 | 2.76 %  | 2 | 65.1 | 8.19 |
| P04715 | Ribulose biphosphate carboxylase small chain SSU11A, chloroplastic OS=Petunia hybrida | 51.98 | 11.67 % | 2 | 20.3 | 8.12 |
| Q9SNY3 | GDP-mannose 4,6 dehydratase 1 OS=Arabidopsis thaliana                                 | 51.72 | 4.43 %  | 2 | 40.8 | 7.11 |
